# Supplementary material for: Salivary bacterial fingerprints of established oral disease revealed by the Human Oral Microbe Identification using Next Generation Sequencing (HOMINGS) technique
Source: PubMed Central journal article supplement — J Oral Microbiol. 2016 Jan 14;8:10.3402/jom.v8.30170. doi: 10.3402/jom.v8.30170 (PMC4717152; doi:10.3402/jom.v8.30170), 2016-01-14
Supplement: JOM-8-30170-s001.pdf [file JOM-8-30170-s001.pdf]

## Supplemental material:

### S1: Probes present in the Probeseq database

| Probe ID | HOT | Organism Name                          |
|----------|-----|----------------------------------------|
| AB-01    | 389 | <i>Abiotrophia_defectiva</i>           |
| AC-01    | 554 | <i>Acinetobacter_baumannii</i>         |
| AC-02    | 408 | <i>Acinetobacter_sp_oral_taxon_408</i> |
| AC-03    | 183 | <i>Actinobaculum_sp_oral_taxon_183</i> |
| AC-04    | 850 | <i>Actinomyces_cardiffensis</i>        |
| AC-06    | 617 | <i>Actinomyces_georgiae</i>            |
| AC-07    | 618 | <i>Actinomyces_gerencseriae</i>        |
| AC-08    | 866 | <i>Actinomyces_graevenitzii</i>        |
| AC-09    | 645 | <i>Actinomyces_israelii</i>            |
| AC-10    | 849 | <i>Actinomyces_johnsonii</i>           |
| AC-11    | 852 | <i>Actinomyces_massiliensis</i>        |
| AC-12    | 671 | <i>Actinomyces_meyeri</i>              |
| AC-13    | 176 | <i>Actinomyces_naeslundii</i>          |
| AC-14    | 701 | <i>Actinomyces_odontolyticus</i>       |
| AC-15    | 708 | <i>Actinomyces_oricola</i>             |
| AC-16    | 746 | <i>Actinomyces_radicidentis</i>        |
| AC-17    | 169 | <i>Actinomyces_sp_oral_taxon_169</i>   |
| AC-18    | 170 | <i>Actinomyces_sp_oral_taxon_170</i>   |
| AC-19    | 171 | <i>Actinomyces_sp_oral_taxon_171</i>   |
| AC-20    | 172 | <i>Actinomyces_sp_oral_taxon_172</i>   |
| AC-21    | 175 | <i>Actinomyces_sp_oral_taxon_175</i>   |

|              |            |                                              |
|--------------|------------|----------------------------------------------|
| <b>AC-22</b> | <b>178</b> | <i>Actinomyces_sp_oral_taxon_178</i>         |
| <b>AC-23</b> | <b>180</b> | <i>Actinomyces_sp_oral_taxon_180</i>         |
| <b>AC-24</b> | <b>181</b> | <i>Actinomyces_sp_oral_taxon_181</i>         |
| <b>AC-25</b> | <b>414</b> | <i>Actinomyces_sp_oral_taxon_414</i>         |
| <b>AC-26</b> | <b>446</b> | <i>Actinomyces_sp_oral_taxon_446</i>         |
| <b>AC-27</b> | <b>448</b> | <i>Actinomyces_sp_oral_taxon_448</i>         |
| <b>AC-28</b> | <b>525</b> | <i>Actinomyces_sp_oral_taxon_525</i>         |
| <b>AC-29</b> | <b>848</b> | <i>Actinomyces_sp_oral_taxon_848</i>         |
| <b>AC-30</b> | <b>877</b> | <i>Actinomyces_sp_oral_taxon_877</i>         |
| <b>AC-31</b> | <b>896</b> | <i>Actinomyces_sp_oral_taxon_896</i>         |
| <b>AC-32</b> | <b>897</b> | <i>Actinomyces_sp_oral_taxon_897</i>         |
| <b>AC-33</b> | <b>179</b> | <i>Actinomyces_timonensis</i>                |
| <b>AC-34</b> | <b>688</b> | <i>Actinomyces_viscosus</i>                  |
| <b>AC-35</b> | <b>866</b> | <i>Actinomyces_graevenitzii</i>              |
| <b>AC-36</b> | <b>176</b> | <i>Actinomyces_naeslundii</i>                |
| <b>AC-37</b> | <b>701</b> | <i>Actinomyces_odontolyticus</i>             |
| <b>AC-38</b> | <b>701</b> | <i>Actinomyces_odontolyticus</i>             |
| <b>AC-39</b> | <b>746</b> | <i>Actinomyces_radicidentis</i>              |
| <b>AC-40</b> | <b>525</b> | <i>Actinomyces_sp_oral_taxon_525</i>         |
| <b>AC-41</b> | <b>179</b> | <i>Actinomyces_timonensis</i>                |
| <b>AG-01</b> | <b>531</b> | <i>Aggregatibacter_actinomycetemcomitans</i> |
| <b>AG-03</b> | <b>720</b> | <i>Aggregatibacter_paraphrophilus</i>        |
| <b>AG-05</b> | <b>512</b> | <i>Aggregatibacter_sp_oral_taxon_512</i>     |
| <b>AG-06</b> | <b>513</b> | <i>Aggregatibacter_sp_oral_taxon_513</i>     |
| <b>AG-07</b> | <b>485</b> | <i>Agrobacterium_tumefaciens</i>             |
| <b>AG-08</b> | <b>458</b> | <i>Aggregatibacter_sp_oral_taxon_458</i>     |

|              |            |                                         |
|--------------|------------|-----------------------------------------|
| <b>AG-09</b> | <b>720</b> | <i>Aggregatibacter paraphrophilus</i>   |
| <b>AL-01</b> | <b>831</b> | <i>Alloiococcus otitis</i>              |
| <b>AL-02</b> | <b>302</b> | <i>Alloprevotella rava</i>              |
| <b>AL-03</b> | <b>308</b> | <i>Alloprevotella_sp_oral_taxon_308</i> |
| <b>AL-04</b> | <b>473</b> | <i>Alloprevotella_sp_oral_taxon_473</i> |
| <b>AL-05</b> | <b>474</b> | <i>Alloprevotella_sp_oral_taxon_474</i> |
| <b>AL-06</b> | <b>912</b> | <i>Alloprevotella_sp_oral_taxon_912</i> |
| <b>AL-07</b> | <b>913</b> | <i>Alloprevotella_sp_oral_taxon_913</i> |
| <b>AL-08</b> | <b>914</b> | <i>Alloprevotella_sp_oral_taxon_914</i> |
| <b>AL-09</b> | <b>466</b> | <i>Alloprevotella tannerae</i>          |
| <b>AL-10</b> | <b>198</b> | <i>Alloscardovia omnicolens</i>         |
| <b>AL-11</b> | <b>914</b> | <i>Alloprevotella_sp_oral_taxon_914</i> |
| <b>AN-01</b> | <b>859</b> | <i>Anaerococcus lactolyticus</i>        |
| <b>AN-03</b> | <b>121</b> | <i>Anaeroglobus geminatus</i>           |
| <b>AQ-01</b> | <b>660</b> | <i>Aquamicrobium lusatiense</i>         |
| <b>AR-01</b> | <b>811</b> | <i>Arcanobacterium haemolyticum</i>     |
| <b>AR-02</b> | <b>190</b> | <i>Arsenicicoccus_sp_oral_taxon_190</i> |
| <b>AT-01</b> | <b>674</b> | <i>Atopobium minutum</i>                |
| <b>AT-02</b> | <b>723</b> | <i>Atopobium parvulum</i>               |
| <b>AT-03</b> | <b>750</b> | <i>Atopobium rimae</i>                  |
| <b>AT-04</b> | <b>199</b> | <i>Atopobium_sp_oral_taxon_199</i>      |
| <b>AT-05</b> | <b>416</b> | <i>Atopobium_sp_oral_taxon_416</i>      |
| <b>AT-06</b> | <b>810</b> | <i>Atopobium_sp_oral_taxon_810</i>      |
| <b>AT-07</b> | <b>814</b> | <i>Atopobium vaginae</i>                |
| <b>AT-08</b> | <b>723</b> | <i>Atopobium parvulum</i>               |
| <b>AT-09</b> | <b>750</b> | <i>Atopobium rimae</i>                  |

|              |            |                                                  |
|--------------|------------|--------------------------------------------------|
| <b>BA-01</b> | <b>45</b>  | <i>Bacillus_clausii</i>                          |
| <b>BA-02</b> | <b>272</b> | <i>Bacteroidaceae[G-1]_sp_oral_taxon_272</i>     |
| <b>BA-03</b> | <b>274</b> | <i>Bacteroidales[G-2]_sp_oral_taxon_274</i>      |
| <b>BA-04</b> | <b>911</b> | <i>Bacteroidales[G-3]_sp_oral_taxon_911</i>      |
| <b>BA-05</b> | <b>630</b> | <i>Bacteroides_heparinolyticus</i>               |
| <b>BA-06</b> | <b>787</b> | <i>Bacteroides_tectus</i>                        |
| <b>BA-07</b> | <b>465</b> | <i>Bacteroides_zoogleoformans</i>                |
| <b>BA-08</b> | <b>280</b> | <i>Bacteroidetes[G-3]_sp_oral_taxon_280</i>      |
| <b>BA-09</b> | <b>281</b> | <i>Bacteroidetes[G-3]_sp_oral_taxon_281</i>      |
| <b>BA-10</b> | <b>365</b> | <i>Bacteroidetes[G-3]_sp_oral_taxon_365</i>      |
| <b>BA-11</b> | <b>436</b> | <i>Bacteroidetes[G-3]_sp_oral_taxon_436</i>      |
| <b>BA-12</b> | <b>503</b> | <i>Bacteroidetes[G-3]_sp_oral_taxon_503</i>      |
| <b>BA-13</b> | <b>899</b> | <i>Bacteroidetes[G-3]_sp_oral_taxon_899</i>      |
| <b>BA-14</b> | <b>509</b> | <i>Bacteroidetes[G-4]_sp_oral_taxon_509</i>      |
| <b>BA-15</b> | <b>505</b> | <i>Bacteroidetes[G-5]_sp_oral_taxon_505</i>      |
| <b>BA-16</b> | <b>507</b> | <i>Bacteroidetes[G-5]_sp_oral_taxon_507</i>      |
| <b>BA-17</b> | <b>511</b> | <i>Bacteroidetes[G-5]_sp_oral_taxon_511</i>      |
| <b>BA-18</b> | <b>516</b> | <i>Bacteroidetes[G-6]_sp_oral_taxon_516</i>      |
| <b>BA-19</b> | <b>511</b> | <i>Bacteroidetes[G-5]_sp_oral_taxon_511</i>      |
| <b>BD-01</b> | <b>39</b>  | <i>Bdellovibrio_sp_oral_taxon_039</i>            |
| <b>BE-01</b> | <b>319</b> | <i>Bergeyella_sp_oral_taxon_319</i>              |
| <b>BE-02</b> | <b>322</b> | <i>Bergeyella_sp_oral_taxon_322</i>              |
| <b>BE-03</b> | <b>900</b> | <i>Bergeyella_sp_oral_taxon_900</i>              |
| <b>BE-04</b> | <b>907</b> | <i>Bergeyella_sp_oral_taxon_907</i>              |
| <b>BI-01</b> | <b>407</b> | <i>Bifidobacteriaceae[G-2]_sp_oral_taxon_407</i> |
| <b>BI-02</b> | <b>895</b> | <i>Bifidobacterium_animalis_subsp_animalis</i>   |

|              |            |                                              |
|--------------|------------|----------------------------------------------|
| <b>BI-03</b> | <b>895</b> | <i>Bifidobacterium_animalis_subsp_lactis</i> |
| <b>BI-04</b> | <b>889</b> | <i>Bifidobacterium_breve</i>                 |
| <b>BI-05</b> | <b>588</b> | <i>Bifidobacterium_dentium</i>               |
| <b>BI-06</b> | <b>862</b> | <i>Bifidobacterium_longum</i>                |
| <b>BI-07</b> | <b>891</b> | <i>Bifidobacterium_scardovii</i>             |
| <b>BR-01</b> | <b>590</b> | <i>Brevundimonas_diminuta</i>                |
| <b>BU-01</b> | <b>603</b> | <i>Bulleidia_extracta</i>                    |
| <b>BU-02</b> | <b>94</b>  | <i>Butyrivibrio_sp_oral_taxon_094</i>        |
| <b>CA-01</b> | <b>575</b> | <i>Campylobacter_concisus</i>                |
| <b>CA-02</b> | <b>575</b> | <i>Campylobacter_concisus</i>                |
| <b>CA-03</b> | <b>580</b> | <i>Campylobacter_curvus</i>                  |
| <b>CA-04</b> | <b>623</b> | <i>Campylobacter_gracilis</i>                |
| <b>CA-06</b> | <b>44</b>  | <i>Campylobacter_sp_oral_taxon_044</i>       |
| <b>CA-07</b> | <b>776</b> | <i>Campylobacter_sputorum</i>                |
| <b>CA-08</b> | <b>842</b> | <i>Campylobacter_ureolyticus</i>             |
| <b>CA-09</b> | <b>337</b> | <i>Capnocytophaga_gingivalis</i>             |
| <b>CA-10</b> | <b>325</b> | <i>Capnocytophaga_granulosa</i>              |
| <b>CA-11</b> | <b>627</b> | <i>Capnocytophaga_haemolytica</i>            |
| <b>CA-12</b> | <b>329</b> | <i>Capnocytophaga_leadbetteri</i>            |
| <b>CA-13</b> | <b>700</b> | <i>Capnocytophaga_ochracea</i>               |
| <b>CA-14</b> | <b>323</b> | <i>Capnocytophaga_sp_oral_taxon_323</i>      |
| <b>CA-15</b> | <b>324</b> | <i>Capnocytophaga_sp_oral_taxon_324</i>      |
| <b>CA-17</b> | <b>332</b> | <i>Capnocytophaga_sp_oral_taxon_332</i>      |
| <b>CA-18</b> | <b>334</b> | <i>Capnocytophaga_sp_oral_taxon_334</i>      |
| <b>CA-19</b> | <b>335</b> | <i>Capnocytophaga_sp_oral_taxon_335</i>      |
| <b>CA-20</b> | <b>336</b> | <i>Capnocytophaga_sp_oral_taxon_336</i>      |

|       |     |                                                  |
|-------|-----|--------------------------------------------------|
| CA-21 | 338 | <i>Capnocytophaga_sp_oral_taxon_338</i>          |
| CA-22 | 380 | <i>Capnocytophaga_sp_oral_taxon_380</i>          |
| CA-23 | 412 | <i>Capnocytophaga_sp_oral_taxon_412</i>          |
| CA-24 | 863 | <i>Capnocytophaga_sp_oral_taxon_863</i>          |
| CA-25 | 864 | <i>Capnocytophaga_sp_oral_taxon_864</i>          |
| CA-26 | 878 | <i>Capnocytophaga_sp_oral_taxon_878</i>          |
| CA-27 | 901 | <i>Capnocytophaga_sp_oral_taxon_901</i>          |
| CA-28 | 902 | <i>Capnocytophaga_sp_oral_taxon_902</i>          |
| CA-29 | 903 | <i>Capnocytophaga_sp_oral_taxon_903</i>          |
| CA-30 | 775 | <i>Capnocytophaga_sputigena</i>                  |
| CA-31 | 633 | <i>Cardiobacterium_hominis</i>                   |
| CA-32 | 540 | <i>Cardiobacterium_valvarum</i>                  |
| CA-34 | 451 | <i>Catonella_sp_oral_taxon_451</i>               |
| CA-35 | 2   | <i>Caulobacter_sp_oral_taxon_002</i>             |
| CE-01 | 726 | <i>Centipeda_periodontii</i>                     |
| CH-01 | 733 | <i>Chlamydophila_pneumoniae</i>                  |
| CH-02 | 439 | <i>Chloroflexi[G-1]_sp_oral_taxon_439</i>        |
| CH-03 | 439 | <i>Chloroflexi[G-1]_sp_oral_taxon_439</i>        |
| CL-01 | 93  | <i>Clostridiales[F-1][G-1]_sp_oral_taxon_093</i> |
| CL-02 | 402 | <i>Clostridiales[F-1][G-2]_sp_oral_taxon_402</i> |
| CL-03 | 75  | <i>Clostridiales[F-2][G-1]_sp_oral_taxon_075</i> |
| CL-04 | 85  | <i>Clostridiales[F-2][G-2]_sp_oral_taxon_085</i> |
| CL-05 | 366 | <i>Clostridiales[F-2][G-3]_sp_oral_taxon_366</i> |
| CL-06 | 381 | <i>Clostridiales[F-2][G-3]_sp_oral_taxon_381</i> |
| CL-07 | 876 | <i>Clostridiales[F-3][G-1]_sp_oral_taxon_876</i> |
| CL-08 | 75  | <i>Clostridiales[F-2][G-1]_sp_oral_taxon_075</i> |

|       |     |                                          |
|-------|-----|------------------------------------------|
| CO-01 | 591 | <i>Corynebacterium_diphtheriae</i>       |
| CO-02 | 595 | <i>Corynebacterium_durum</i>             |
| CO-03 | 666 | <i>Corynebacterium_matruchotii</i>       |
| CO-04 | 835 | <i>Corynebacterium_mucifaciens</i>       |
| CO-05 | 184 | <i>Corynebacterium_sp_oral_taxon_184</i> |
| CO-06 | 853 | <i>Corynebacterium_urealyticum</i>       |
| CO-07 | 591 | <i>Corynebacterium_diphtheriae</i>       |
| CO-08 | 591 | <i>Corynebacterium_diphtheriae</i>       |
| CR-01 | 579 | <i>Cryptobacterium_curtum</i>            |
| DE-01 | 23  | <i>Delftia_acidovorans</i>               |
| DE-02 | 41  | <i>Desulfobulbus_sp_oral_taxon_041</i>   |
| DE-03 | 703 | <i>Desulfomicrobium_orale</i>            |
| DE-04 | 605 | <i>Desulfovibrio_fairfieldensis</i>      |
| DE-05 | 40  | <i>Desulfovibrio_sp_oral_taxon_040</i>   |
| DI-01 | 118 | <i>Dialister_invisus</i>                 |
| DI-02 | 843 | <i>Dialister_micraerophilus</i>          |
| DI-03 | 736 | <i>Dialister_pneumosintes</i>            |
| DI-04 | 119 | <i>Dialister_sp_oral_taxon_119</i>       |
| DI-05 | 502 | <i>Dialister_sp_oral_taxon_502</i>       |
| DI-06 | 368 | <i>Dietzia_sp_oral_taxon_368</i>         |
| DI-07 | 502 | <i>Dialister_sp_oral_taxon_502</i>       |
| DI-08 | 502 | <i>Dialister_sp_oral_taxon_502</i>       |
| DI-09 | 502 | <i>Dialister_sp_oral_taxon_502</i>       |
| DO-01 | 813 | <i>Dolosigranulum_pigrum</i>             |
| EG-01 | 654 | <i>Eggerthella_lenta</i>                 |
| EG-02 | 569 | <i>Eggerthia_catenaformis</i>            |

|              |            |                                                    |
|--------------|------------|----------------------------------------------------|
| <b>EI-01</b> | <b>577</b> | <i>Eikenella_corrodens</i>                         |
| <b>EI-02</b> | <b>11</b>  | <i>Eikenella_sp_oral_taxon_011</i>                 |
| <b>EN-02</b> | <b>604</b> | <i>Enterococcus_faecalis</i>                       |
| <b>ER-01</b> | <b>904</b> | <i>Erysipelothrichaceae[G-1]_sp_oral_taxon_904</i> |
| <b>ER-02</b> | <b>905</b> | <i>Erysipelothrichaceae[G-1]_sp_oral_taxon_905</i> |
| <b>ER-03</b> | <b>484</b> | <i>Erysipelothrix_tonsillarum</i>                  |
| <b>ER-04</b> | <b>747</b> | <i>Erythromicrobium_amosum</i>                     |
| <b>EU-01</b> | <b>655</b> | <i>Eubacterium_limosum</i>                         |
| <b>EU-02</b> | <b>105</b> | <i>Eubacterium[11][G-1]_infirmum</i>               |
| <b>EU-03</b> | <b>467</b> | <i>Eubacterium[11][G-1]_sulci</i>                  |
| <b>EU-04</b> | <b>557</b> | <i>Eubacterium[11][G-3]_brachy</i>                 |
| <b>EU-05</b> | <b>759</b> | <i>Eubacterium[11][G-5]_saphenum</i>               |
| <b>EU-06</b> | <b>673</b> | <i>Eubacterium[11][G-6]_minutum</i>                |
| <b>EU-07</b> | <b>694</b> | <i>Eubacterium[11][G-6]_nodatum</i>                |
| <b>EU-08</b> | <b>377</b> | <i>Eubacterium[11][G-7]_yurii</i>                  |
| <b>EU-09</b> | <b>694</b> | <i>Eubacterium[11][G-6]_nodatum</i>                |
| <b>EU-10</b> | <b>377</b> | <i>Eubacterium[11][G-7]_yurii</i>                  |
| <b>EU-11</b> | <b>655</b> | <i>Eubacterium_limosum</i>                         |
| <b>FI-01</b> | <b>539</b> | <i>Filifactor_alocis</i>                           |
| <b>FI-02</b> | <b>662</b> | <i>Fingoldia_magna</i>                             |
| <b>FL-01</b> | <b>318</b> | <i>Flavobacteriales[G-1]_sp_oral_taxon_318</i>     |
| <b>FL-02</b> | <b>321</b> | <i>Flavobacteriales[G-1]_sp_oral_taxon_321</i>     |
| <b>FL-03</b> | <b>320</b> | <i>Flavobacteriales[G-2]_sp_oral_taxon_320</i>     |
| <b>FR-01</b> | <b>363</b> | <i>Fretibacterium_fastidiosum</i>                  |
| <b>FR-04</b> | <b>360</b> | <i>Fretibacterium_sp_oral_taxon_360</i>            |
| <b>FR-05</b> | <b>361</b> | <i>Fretibacterium_sp_oral_taxon_361</i>            |



|       |     |                                                  |
|-------|-----|--------------------------------------------------|
| FR-06 | 362 | <i>Fretibacterium_sp_oral_taxon_362</i>          |
| FU-01 | 860 | <i>Fusobacterium_gonidiaformans</i>              |
| FU-02 | 860 | <i>Fusobacterium_gonidiaformans</i>              |
| FU-04 | 690 | <i>Fusobacterium_necrophorum</i>                 |
| FU-05 | 420 | <i>Fusobacterium_nucleatum_subsp_animalis</i>    |
| FU-06 | 420 | <i>Fusobacterium_nucleatum_subsp_animalis</i>    |
| FU-07 | 698 | <i>Fusobacterium_nucleatum_subsp_nucleatum</i>   |
| FU-08 | 202 | <i>Fusobacterium_nucleatum_subsp_polymorphum</i> |
| FU-09 | 200 | <i>Fusobacterium_nucleatum_subsp_vincentii</i>   |
| FU-10 | 201 | <i>Fusobacterium_periodonticum</i>               |
| FU-11 | 205 | <i>Fusobacterium_sp_oral_taxon_205</i>           |
| GA-01 | 829 | <i>Gardnerella_vaginalis</i>                     |
| GE-01 | 555 | <i>Gemella_bergeri</i>                           |
| GE-02 | 626 | <i>Gemella_haemolysans</i>                       |
| GE-03 | 46  | <i>Gemella_morbilloorum</i>                      |
| GE-04 | 757 | <i>Gemella_sanguinis</i>                         |
| GE-05 | 46  | <i>Gemella_morbilloorum</i>                      |
| GN-01 | 871 | GN02[G-1]_sp_oral_taxon_871                      |
| GN-02 | 872 | GN02[G-1]_sp_oral_taxon_872                      |
| GN-03 | 873 | GN02[G-2]_sp_oral_taxon_873                      |
| GR-02 | 596 | <i>Granulicatella_elegans</i>                    |
| HA-02 | 821 | <i>Haemophilus_ducreyi</i>                       |
| HA-04 | *   | <i>Haemophilus_parahaemolyticus</i>              |
| HA-05 | 718 | <i>Haemophilus_parainfluenzae</i>                |
| HA-06 | 35  | <i>Haemophilus_sp_oral_taxon_035</i>             |
| HE-01 | 812 | <i>Helicobacter_pylori</i>                       |

|              |            |                                               |
|--------------|------------|-----------------------------------------------|
| <b>JO-01</b> | <b>635</b> | <i>Johnsonella_ignava</i>                     |
| <b>JO-02</b> | <b>166</b> | <i>Johnsonella_sp_oral_taxon_166</i>          |
| <b>JO-03</b> | <b>777</b> | <i>Jonquetella_anthropi</i>                   |
| <b>KI-02</b> | <b>646</b> | <i>Kingella_kingae</i>                        |
| <b>KI-03</b> | <b>706</b> | <i>Kingella_oralis</i>                        |
| <b>KI-04</b> | <b>459</b> | <i>Kingella_sp_oral_taxon_459</i>             |
| <b>LA-01</b> | <b>82</b>  | <i>Lachnoanaerobaculum_orale</i>              |
| <b>LA-02</b> | <b>494</b> | <i>Lachnoanaerobaculum_saburreum</i>          |
| <b>LA-03</b> | <b>83</b>  | <i>Lachnoanaerobaculum_sp_oral_taxon_083</i>  |
| <b>LA-04</b> | <b>89</b>  | <i>Lachnoanaerobaculum_sp_oral_taxon_089</i>  |
| <b>LA-05</b> | <b>496</b> | <i>Lachnoanaerobaculum_sp_oral_taxon_496</i>  |
| <b>LA-06</b> | <b>107</b> | <i>Lachnoanaerobaculum_umeaense</i>           |
| <b>LA-07</b> | <b>88</b>  | <i>Lachnospiraceae[G-2]_sp_oral_taxon_088</i> |
| <b>LA-08</b> | <b>96</b>  | <i>Lachnospiraceae[G-2]_sp_oral_taxon_096</i> |
| <b>LA-09</b> | <b>100</b> | <i>Lachnospiraceae[G-3]_sp_oral_taxon_100</i> |
| <b>LA-10</b> | <b>80</b>  | <i>Lachnospiraceae[G-5]_sp_oral_taxon_080</i> |
| <b>LA-11</b> | <b>455</b> | <i>Lachnospiraceae[G-5]_sp_oral_taxon_455</i> |
| <b>LA-12</b> | <b>90</b>  | <i>Lachnospiraceae[G-6]_sp_oral_taxon_090</i> |
| <b>LA-13</b> | <b>86</b>  | <i>Lachnospiraceae[G-7]_sp_oral_taxon_086</i> |
| <b>LA-14</b> | <b>163</b> | <i>Lachnospiraceae[G-7]_sp_oral_taxon_163</i> |
| <b>LA-15</b> | <b>500</b> | <i>Lachnospiraceae[G-8]_sp_oral_taxon_500</i> |
| <b>LA-16</b> | <b>558</b> | <i>Lactobacillus_brevis</i>                   |
| <b>LA-17</b> | <b>816</b> | <i>Lactobacillus_coleohominis</i>             |
| <b>LA-18</b> | <b>608</b> | <i>Lactobacillus_fermentum</i>                |
| <b>LA-20</b> | <b>838</b> | <i>Lactobacillus_iners</i>                    |
| <b>LA-21</b> | <b>839</b> | <i>Lactobacillus_jensenii</i>                 |

|       |     |                                               |
|-------|-----|-----------------------------------------------|
| LA-22 | 424 | <i>Lactobacillus_kisonensis</i>               |
| LA-23 | 418 | <i>Lactobacillus_parafarraginis</i>           |
| LA-24 | 818 | <i>Lactobacillus_reuteri</i>                  |
| LA-25 | 756 | <i>Lactobacillus_salivarius</i>               |
| LA-26 | 52  | <i>Lactobacillus_sp_oral_taxon_052</i>        |
| LA-27 | 51  | <i>Lactobacillus_vaginalis</i>                |
| LA-28 | 804 | <i>Lactococcus_lactis</i>                     |
| LA-29 | 22  | <i>Lautropia_mirabilis</i>                    |
| LA-30 | 88  | <i>Lachnospiraceae[G-2]_sp_oral_taxon_088</i> |
| LA-31 | 100 | <i>Lachnospiraceae[G-3]_sp_oral_taxon_100</i> |
| LA-32 | 100 | <i>Lachnospiraceae[G-3]_sp_oral_taxon_100</i> |
| LE-01 | 24  | <i>Leptothrix_sp_oral_taxon_024</i>           |
| LE-02 | 25  | <i>Leptothrix_sp_oral_taxon_025</i>           |
| LE-04 | 845 | <i>Leptotrichia_goodfellowii</i>              |
| LE-06 | 213 | <i>Leptotrichia_hongkongensis</i>             |
| LE-07 | 214 | <i>Leptotrichia_shahii</i>                    |
| LE-08 | 212 | <i>Leptotrichia_sp_oral_taxon_212</i>         |
| LE-09 | 215 | <i>Leptotrichia_sp_oral_taxon_215</i>         |
| LE-10 | 217 | <i>Leptotrichia_sp_oral_taxon_217</i>         |
| LE-11 | 218 | <i>Leptotrichia_sp_oral_taxon_218</i>         |
| LE-12 | 219 | <i>Leptotrichia_sp_oral_taxon_219</i>         |
| LE-13 | 221 | <i>Leptotrichia_sp_oral_taxon_221</i>         |
| LE-14 | 223 | <i>Leptotrichia_sp_oral_taxon_223</i>         |
| LE-15 | 392 | <i>Leptotrichia_sp_oral_taxon_392</i>         |
| LE-16 | 417 | <i>Leptotrichia_sp_oral_taxon_417</i>         |
| LE-17 | 462 | <i>Leptotrichia_sp_oral_taxon_462</i>         |

|              |            |                                                |
|--------------|------------|------------------------------------------------|
| <b>LE-18</b> | <b>463</b> | <i>Leptotrichia_sp_oral_taxon_463</i>          |
| <b>LE-19</b> | <b>498</b> | <i>Leptotrichia_sp_oral_taxon_498</i>          |
| <b>LE-20</b> | <b>847</b> | <i>Leptotrichia_sp_oral_taxon_847</i>          |
| <b>LE-21</b> | <b>879</b> | <i>Leptotrichia_sp_oral_taxon_879</i>          |
| <b>LE-22</b> | <b>222</b> | <i>Leptotrichia_wadei</i>                      |
| <b>LE-23</b> | <b>210</b> | <i>Leptotrichiaceae[G-1]_sp_oral_taxon_210</i> |
| <b>LE-24</b> | <b>220</b> | <i>Leptotrichiaceae[G-1]_sp_oral_taxon_220</i> |
| <b>LE-25</b> | <b>223</b> | <i>Leptotrichia_sp_oral_taxon_223</i>          |
| <b>LE-26</b> | <b>215</b> | <i>Leptotrichia_sp_oral_taxon_215</i>          |
| <b>LY-01</b> | <b>614</b> | <i>Lysinibacillus_fusiformis</i>               |
| <b>ME-01</b> | <b>122</b> | <i>Megasphaera_micronuciformis</i>             |
| <b>ME-02</b> | <b>123</b> | <i>Megasphaera_sp_oral_taxon_123</i>           |
| <b>ME-03</b> | <b>123</b> | <i>Megasphaera_sp_oral_taxon_123</i>           |
| <b>ME-04</b> | <b>841</b> | <i>Megasphaera_sp_oral_taxon_841</i>           |
| <b>MI-01</b> | <b>185</b> | <i>Microbacterium_sp_oral_taxon_185</i>        |
| <b>MI-02</b> | <b>684</b> | <i>Mitsuokella_multacida</i>                   |
| <b>MI-03</b> | <b>131</b> | <i>Mitsuokella_sp_oral_taxon_131</i>           |
| <b>MI-04</b> | <b>521</b> | <i>Mitsuokella_sp_oral_taxon_521</i>           |
| <b>MI-05</b> | <b>521</b> | <i>Mitsuokella_sp_oral_taxon_521</i>           |
| <b>MI-06</b> | <b>521</b> | <i>Mitsuokella_sp_oral_taxon_521</i>           |
| <b>MO-01</b> | <b>830</b> | <i>Mobiluncus_mulieris</i>                     |
| <b>MO-02</b> | <b>593</b> | <i>Mogibacterium_diversum</i>                  |
| <b>MO-03</b> | <b>742</b> | <i>Mogibacterium_pumilum</i>                   |
| <b>MO-04</b> | <b>42</b>  | <i>Mogibacterium_timidum</i>                   |
| <b>MO-05</b> | <b>504</b> | <i>Mollicutes[G-1]_sp_oral_taxon_504</i>       |
| <b>MO-06</b> | <b>906</b> | <i>Mollicutes[G-2]_sp_oral_taxon_906</i>       |

|              |            |                                    |
|--------------|------------|------------------------------------|
| <b>MY-01</b> | <b>823</b> | <i>Mycobacterium_leprae</i>        |
| <b>MY-02</b> | <b>561</b> | <i>Mycoplasma_buccale</i>          |
| <b>MY-03</b> | <b>606</b> | <i>Mycoplasma_faucium</i>          |
| <b>MY-04</b> | <b>607</b> | <i>Mycoplasma_fermentans</i>       |
| <b>MY-05</b> | <b>616</b> | <i>Mycoplasma_genitalium</i>       |
| <b>MY-06</b> | <b>632</b> | <i>Mycoplasma_hominis</i>          |
| <b>MY-07</b> | <b>656</b> | <i>Mycoplasma_lipophilum</i>       |
| <b>MY-08</b> | <b>704</b> | <i>Mycoplasma_orale</i>            |
| <b>MY-09</b> | <b>732</b> | <i>Mycoplasma_pneumoniae</i>       |
| <b>MY-10</b> | <b>754</b> | <i>Mycoplasma_salivarium</i>       |
| <b>NE-01</b> | <b>13</b>  | <i>Neisseria_bacilliformis</i>     |
| <b>NE-02</b> | <b>598</b> | <i>Neisseria_elongata</i>          |
| <b>NE-03</b> | <b>610</b> | <i>Neisseria_flavescens</i>        |
| <b>NE-04</b> | <b>621</b> | <i>Neisseria_gonorrhoeae</i>       |
| <b>NE-05</b> | <b>649</b> | <i>Neisseria_lactamica</i>         |
| <b>NE-06</b> | <b>669</b> | <i>Neisseria_meningitidis</i>      |
| <b>NE-08</b> | <b>729</b> | <i>Neisseria_pharyngis</i>         |
| <b>NE-09</b> | <b>764</b> | <i>Neisseria_sicca</i>             |
| <b>NE-10</b> | <b>18</b>  | <i>Neisseria_sp_oral_taxon_018</i> |
| <b>NE-11</b> | <b>20</b>  | <i>Neisseria_sp_oral_taxon_020</i> |
| <b>NE-12</b> | <b>499</b> | <i>Neisseria_sp_oral_taxon_499</i> |
| <b>NE-13</b> | <b>523</b> | <i>Neisseria_sp_oral_taxon_523</i> |
| <b>NE-14</b> | <b>92</b>  | <i>Neisseria_weaveri</i>           |
| <b>NE-15</b> | <b>729</b> | <i>Neisseria_pharyngis</i>         |
| <b>NE-16</b> | <b>610</b> | <i>Neisseria_flavescens</i>        |
| <b>NE-17</b> | <b>476</b> | <i>Neisseria_subflava</i>          |

|              |            |                                                         |
|--------------|------------|---------------------------------------------------------|
| <b>OL-01</b> | <b>806</b> | <i>Olsenella_profusa</i>                                |
| <b>OL-02</b> | <b>807</b> | <i>Olsenella_sp_oral_taxon_807</i>                      |
| <b>OL-03</b> | <b>809</b> | <i>Olsenella_sp_oral_taxon_809</i>                      |
| <b>OL-04</b> | <b>38</b>  | <i>Olsenella_uli</i>                                    |
| <b>OR-01</b> | <b>457</b> | <i>Oribacterium_sinus</i>                               |
| <b>OR-03</b> | <b>102</b> | <i>Oribacterium_sp_oral_taxon_102</i>                   |
| <b>OR-04</b> | <b>108</b> | <i>Oribacterium_sp_oral_taxon_108</i>                   |
| <b>OR-05</b> | <b>108</b> | <i>Oribacterium_sp_oral_taxon_108</i>                   |
| <b>OR-06</b> | <b>108</b> | <i>Oribacterium_sp_oral_taxon_108</i>                   |
| <b>OT-01</b> | <b>894</b> | <i>Ottowia_sp_oral_taxon_894</i>                        |
| <b>OT-02</b> | <b>894</b> | <i>Ottowia_sp_oral_taxon_894</i>                        |
| <b>PA-01</b> | <b>786</b> | <i>Paenibacillus_sp_oral_taxon_786</i>                  |
| <b>PA-02</b> | <b>586</b> | <i>Parascardovia_denticolens</i>                        |
| <b>PA-03</b> | <b>111</b> | <i>Parvimonas_micra</i>                                 |
| <b>PA-04</b> | <b>110</b> | <i>Parvimonas_sp_oral_taxon_110</i>                     |
| <b>PE-01</b> | <b>167</b> | <i>Peptococcus_sp_oral_taxon_167</i>                    |
| <b>PE-02</b> | <b>168</b> | <i>Peptococcus_sp_oral_taxon_168</i>                    |
| <b>PE-03</b> | <b>548</b> | <i>Peptoniphilus_asaccharolyticus</i>                   |
| <b>PE-04</b> | <b>840</b> | <i>Peptoniphilus_indolicus</i>                          |
| <b>PE-05</b> | <b>648</b> | <i>Peptoniphilus_lacrimalis</i>                         |
| <b>PE-06</b> | <b>375</b> | <i>Peptoniphilus_sp_oral_taxon_375</i>                  |
| <b>PE-07</b> | <b>386</b> | <i>Peptoniphilus_sp_oral_taxon_386</i>                  |
| <b>PE-08</b> | <b>836</b> | <i>Peptoniphilus_sp_oral_taxon_836</i>                  |
| <b>PE-09</b> | <b>383</b> | <i>Peptostreptococcaceae[11][G-1]_sp_oral_taxon_383</i> |
| <b>PE-10</b> | <b>91</b>  | <i>Peptostreptococcaceae[11][G-2]_sp_oral_taxon_091</i> |
| <b>PE-11</b> | <b>382</b> | <i>Peptostreptococcaceae[11][G-3]_sp_oral_taxon_382</i> |

|       |     |                                                          |
|-------|-----|----------------------------------------------------------|
| PE-12 | 495 | <i>Peptostreptococcaceae</i> [11][G-3]_sp_oral_taxon_495 |
| PE-13 | 103 | <i>Peptostreptococcaceae</i> [11][G-4]_sp_oral_taxon_103 |
| PE-14 | 369 | <i>Peptostreptococcaceae</i> [11][G-4]_sp_oral_taxon_369 |
| PE-15 | 493 | <i>Peptostreptococcaceae</i> [11][G-5]_sp_oral_taxon_493 |
| PE-16 | 81  | <i>Peptostreptococcaceae</i> [11][G-7]_sp_oral_taxon_081 |
| PE-17 | 106 | <i>Peptostreptococcaceae</i> [11][G-7]_sp_oral_taxon_106 |
| PE-18 | 113 | <i>Peptostreptococcaceae</i> [13][G-1]_sp_oral_taxon_113 |
| PE-19 | 790 | <i>Peptostreptococcaceae</i> [13][G-2]_sp_oral_taxon_790 |
| PE-20 | 542 | <i>Peptostreptococcus_anaerobius</i>                     |
| PE-21 | 112 | <i>Peptostreptococcus_stomatis</i>                       |
| PE-22 | 167 | <i>Peptococcus_sp_oral_taxon_167</i>                     |
| PE-23 | 91  | <i>Peptostreptococcaceae</i> [11][G-2]_sp_oral_taxon_091 |
| PE-24 | 91  | <i>Peptostreptococcaceae</i> [11][G-2]_sp_oral_taxon_091 |
| PO-01 | 547 | <i>Porphyromonas_asaccharolytica</i>                     |
| PO-02 | 283 | <i>Porphyromonas_catoniae</i>                            |
| PO-03 | 273 | <i>Porphyromonas_endodontalis</i>                        |
| PO-05 | 619 | <i>Porphyromonas_gingivalis</i>                          |
| PO-06 | 275 | <i>Porphyromonas_sp_oral_taxon_275</i>                   |
| PO-09 | 279 | <i>Porphyromonas_sp_oral_taxon_279</i>                   |
| PO-10 | 284 | <i>Porphyromonas_sp_oral_taxon_284</i>                   |
| PO-11 | 285 | <i>Porphyromonas_sp_oral_taxon_285</i>                   |
| PO-12 | 395 | <i>Porphyromonas_sp_oral_taxon_395</i>                   |
| PO-13 | 785 | <i>Porphyromonas_uenonis</i>                             |
| PO-14 | 283 | <i>Porphyromonas_catoniae</i>                            |
| PO-15 | 283 | <i>Porphyromonas_catoniae</i>                            |
| PO-16 | 283 | <i>Porphyromonas_catoniae</i>                            |

|              |            |                                        |
|--------------|------------|----------------------------------------|
| <b>PO-17</b> | <b>283</b> | <i>Porphyromonas_catoniae</i>          |
| <b>PO-18</b> | <b>283</b> | <i>Porphyromonas_catoniae</i>          |
| <b>PO-19</b> | <b>275</b> | <i>Porphyromonas_sp_oral_taxon_275</i> |
| <b>PO-20</b> | <b>275</b> | <i>Porphyromonas_sp_oral_taxon_275</i> |
| <b>PO-21</b> | <b>277</b> | <i>Porphyromonas_sp_oral_taxon_277</i> |
| <b>PO-22</b> | <b>277</b> | <i>Porphyromonas_sp_oral_taxon_277</i> |
| <b>PO-23</b> | <b>278</b> | <i>Porphyromonas_sp_oral_taxon_278</i> |
| <b>PO-24</b> | <b>279</b> | <i>Porphyromonas_sp_oral_taxon_279</i> |
| <b>PO-25</b> | <b>279</b> | <i>Porphyromonas_sp_oral_taxon_279</i> |
| <b>PR-01</b> | <b>553</b> | <i>Prevotella_baroniae</i>             |
| <b>PR-02</b> | <b>556</b> | <i>Prevotella_bivia</i>                |
| <b>PR-03</b> | <b>560</b> | <i>Prevotella_buccae</i>               |
| <b>PR-04</b> | <b>562</b> | <i>Prevotella_buccalis</i>             |
| <b>PR-05</b> | <b>583</b> | <i>Prevotella_dentalis</i>             |
| <b>PR-06</b> | <b>291</b> | <i>Prevotella_denticola</i>            |
| <b>PR-07</b> | <b>600</b> | <i>Prevotella_enoeca</i>               |
| <b>PR-08</b> | <b>782</b> | <i>Prevotella_fusca</i>                |
| <b>PR-09</b> | <b>298</b> | <i>Prevotella_histicola</i>            |
| <b>PR-10</b> | <b>643</b> | <i>Prevotella_intermedia</i>           |
| <b>PR-11</b> | <b>658</b> | <i>Prevotella_loescheii</i>            |
| <b>PR-12</b> | <b>289</b> | <i>Prevotella_maculosa</i>             |
| <b>PR-13</b> | <b>665</b> | <i>Prevotella_marshii</i>              |
| <b>PR-14</b> | <b>469</b> | <i>Prevotella_melaninogenica</i>       |
| <b>PR-15</b> | <b>378</b> | <i>Prevotella_micans</i>               |
| <b>PR-16</b> | <b>685</b> | <i>Prevotella_multiformis</i>          |
| <b>PR-17</b> | <b>794</b> | <i>Prevotella_multisaccharivorax</i>   |



|              |            |                                     |
|--------------|------------|-------------------------------------|
| <b>PR-18</b> | <b>693</b> | <i>Prevotella_nigrescens</i>        |
| <b>PR-19</b> | <b>705</b> | <i>Prevotella_oralis</i>            |
| <b>PR-20</b> | <b>311</b> | <i>Prevotella_oris</i>              |
| <b>PR-21</b> | <b>288</b> | <i>Prevotella_oulorum</i>           |
| <b>PR-22</b> | <b>714</b> | <i>Prevotella_pallens</i>           |
| <b>PR-23</b> | <b>303</b> | <i>Prevotella_pleuritidis</i>       |
| <b>PR-24</b> | <b>781</b> | <i>Prevotella_saccharolytica</i>    |
| <b>PR-25</b> | <b>307</b> | <i>Prevotella_salivae</i>           |
| <b>PR-26</b> | <b>885</b> | <i>Prevotella_scopos</i>            |
| <b>PR-27</b> | <b>795</b> | <i>Prevotella_shahii</i>            |
| <b>PR-28</b> | <b>292</b> | <i>Prevotella_sp_oral_taxon_292</i> |
| <b>PR-29</b> | <b>292</b> | <i>Prevotella_sp_oral_taxon_292</i> |
| <b>PR-30</b> | <b>293</b> | <i>Prevotella_sp_oral_taxon_293</i> |
| <b>PR-31</b> | <b>296</b> | <i>Prevotella_sp_oral_taxon_296</i> |
| <b>PR-33</b> | <b>300</b> | <i>Prevotella_sp_oral_taxon_300</i> |
| <b>PR-34</b> | <b>300</b> | <i>Prevotella_sp_oral_taxon_300</i> |
| <b>PR-35</b> | <b>301</b> | <i>Prevotella_sp_oral_taxon_301</i> |
| <b>PR-36</b> | <b>304</b> | <i>Prevotella_sp_oral_taxon_304</i> |
| <b>PR-37</b> | <b>305</b> | <i>Prevotella_sp_oral_taxon_305</i> |
| <b>PR-38</b> | <b>306</b> | <i>Prevotella_sp_oral_taxon_306</i> |
| <b>PR-39</b> | <b>309</b> | <i>Prevotella_sp_oral_taxon_309</i> |
| <b>PR-40</b> | <b>310</b> | <i>Prevotella_sp_oral_taxon_310</i> |
| <b>PR-41</b> | <b>315</b> | <i>Prevotella_sp_oral_taxon_315</i> |
| <b>PR-42</b> | <b>317</b> | <i>Prevotella_sp_oral_taxon_317</i> |
| <b>PR-43</b> | <b>376</b> | <i>Prevotella_sp_oral_taxon_376</i> |
| <b>PR-44</b> | <b>396</b> | <i>Prevotella_sp_oral_taxon_396</i> |

|              |            |                                            |
|--------------|------------|--------------------------------------------|
| <b>PR-45</b> | <b>443</b> | <i>Prevotella_sp_oral_taxon_443</i>        |
| <b>PR-46</b> | <b>472</b> | <i>Prevotella_sp_oral_taxon_472</i>        |
| <b>PR-47</b> | <b>475</b> | <i>Prevotella_sp_oral_taxon_475</i>        |
| <b>PR-48</b> | <b>515</b> | <i>Prevotella_sp_oral_taxon_515</i>        |
| <b>PR-49</b> | <b>526</b> | <i>Prevotella_sp_oral_taxon_526</i>        |
| <b>PR-50</b> | <b>820</b> | <i>Prevotella_sp_oral_taxon_820</i>        |
| <b>PR-51</b> | <b>572</b> | <i>Prevotella_veroralis</i>                |
| <b>PR-52</b> | <b>191</b> | <i>Propionibacterium_acidifaciens</i>      |
| <b>PR-53</b> | <b>530</b> | <i>Propionibacterium_acnes</i>             |
| <b>PR-54</b> | <b>552</b> | <i>Propionibacterium_avidum</i>            |
| <b>PR-55</b> | <b>739</b> | <i>Propionibacterium_propionicum</i>       |
| <b>PR-56</b> | <b>192</b> | <i>Propionibacterium_sp_oral_taxon_192</i> |
| <b>PR-57</b> | <b>193</b> | <i>Propionibacterium_sp_oral_taxon_193</i> |
| <b>PR-58</b> | <b>194</b> | <i>Propionibacterium_sp_oral_taxon_194</i> |
| <b>PR-59</b> | <b>915</b> | <i>Propionibacterium_sp_oral_taxon_915</i> |
| <b>PR-60</b> | <b>676</b> | <i>Proteus_mirabilis</i>                   |
| <b>PR-61</b> | <b>600</b> | <i>Prevotella_enoeca</i>                   |
| <b>PR-62</b> | <b>782</b> | <i>Prevotella_fusca</i>                    |
| <b>PR-63</b> | <b>782</b> | <i>Prevotella_fusca</i>                    |
| <b>PR-64</b> | <b>643</b> | <i>Prevotella_intermedia</i>               |
| <b>PR-65</b> | <b>643</b> | <i>Prevotella_intermedia</i>               |
| <b>PR-66</b> | <b>658</b> | <i>Prevotella_loescheii</i>                |
| <b>PR-67</b> | <b>658</b> | <i>Prevotella_loescheii</i>                |
| <b>PR-68</b> | <b>665</b> | <i>Prevotella_marshallii</i>               |
| <b>PR-69</b> | <b>378</b> | <i>Prevotella_micans</i>                   |
| <b>PR-70</b> | <b>714</b> | <i>Prevotella_pallens</i>                  |

|              |            |                                       |
|--------------|------------|---------------------------------------|
| <b>PR-71</b> | <b>781</b> | <i>Prevotella_saccharolytica</i>      |
| <b>PR-72</b> | <b>781</b> | <i>Prevotella_saccharolytica</i>      |
| <b>PR-73</b> | <b>317</b> | <i>Prevotella_sp_oral_taxon_317</i>   |
| <b>PR-74</b> | <b>317</b> | <i>Prevotella_sp_oral_taxon_317</i>   |
| <b>PR-75</b> | <b>552</b> | <i>Propionibacterium_avidum</i>       |
| <b>PS-01</b> | <b>536</b> | <i>Pseudomonas_aeruginosa</i>         |
| <b>PS-02</b> | <b>612</b> | <i>Pseudomonas_fluorescens</i>        |
| <b>PS-03</b> | <b>834</b> | <i>Pseudomonas_otitidis</i>           |
| <b>PS-04</b> | <b>32</b>  | <i>Pseudomonas_sp_oral_taxon_032</i>  |
| <b>PS-06</b> | <b>538</b> | <i>Pseudoramibacter_alactolyticus</i> |
| <b>PY-01</b> | <b>357</b> | <i>Pyramidobacter_piscolens</i>       |
| <b>RH-01</b> | <b>28</b>  | <i>Rhodocyclus_sp_oral_taxon_028</i>  |
| <b>RO-01</b> | <b>188</b> | <i>Rothia_aeria</i>                   |
| <b>RO-02</b> | <b>587</b> | <i>Rothia_dentocariosa</i>            |
| <b>RO-03</b> | <b>681</b> | <i>Rothia_mucilaginosa</i>            |
| <b>SC-01</b> | <b>642</b> | <i>Scardovia_inopinata</i>            |
| <b>SC-02</b> | <b>195</b> | <i>Scardovia_wiggsiae</i>             |
| <b>SE-01</b> | <b>124</b> | <i>Selenomonas_artemidis</i>          |
| <b>SE-02</b> | <b>139</b> | <i>Selenomonas_dianae</i>             |
| <b>SE-03</b> | <b>125</b> | <i>Selenomonas_flueggei</i>           |
| <b>SE-04</b> | <b>130</b> | <i>Selenomonas_noxia</i>              |
| <b>SE-05</b> | <b>130</b> | <i>Selenomonas_noxia</i>              |
| <b>SE-06</b> | <b>133</b> | <i>Selenomonas_sp_oral_taxon_133</i>  |
| <b>SE-07</b> | <b>134</b> | <i>Selenomonas_sp_oral_taxon_134</i>  |
| <b>SE-08</b> | <b>136</b> | <i>Selenomonas_sp_oral_taxon_136</i>  |
| <b>SE-09</b> | <b>137</b> | <i>Selenomonas_sp_oral_taxon_137</i>  |

|              |            |                                      |
|--------------|------------|--------------------------------------|
| <b>SE-10</b> | <b>138</b> | <i>Selenomonas_sp_oral_taxon_138</i> |
| <b>SE-11</b> | <b>143</b> | <i>Selenomonas_sp_oral_taxon_143</i> |
| <b>SE-12</b> | <b>146</b> | <i>Selenomonas_sp_oral_taxon_146</i> |
| <b>SE-13</b> | <b>149</b> | <i>Selenomonas_sp_oral_taxon_149</i> |
| <b>SE-14</b> | <b>388</b> | <i>Selenomonas_sp_oral_taxon_388</i> |
| <b>SE-15</b> | <b>442</b> | <i>Selenomonas_sp_oral_taxon_442</i> |
| <b>SE-16</b> | <b>478</b> | <i>Selenomonas_sp_oral_taxon_478</i> |
| <b>SE-17</b> | <b>501</b> | <i>Selenomonas_sp_oral_taxon_501</i> |
| <b>SE-18</b> | <b>151</b> | <i>Selenomonas_sputigena</i>         |
| <b>SE-19</b> | <b>151</b> | <i>Selenomonas_sputigena</i>         |
| <b>SE-21</b> | <b>124</b> | <i>Selenomonas_artemidis</i>         |
| <b>SE-22</b> | <b>139</b> | <i>Selenomonas_dianae</i>            |
| <b>SE-24</b> | <b>133</b> | <i>Selenomonas_sp_oral_taxon_133</i> |
| <b>SE-25</b> | <b>134</b> | <i>Selenomonas_sp_oral_taxon_134</i> |
| <b>SE-26</b> | <b>134</b> | <i>Selenomonas_sp_oral_taxon_134</i> |
| <b>SE-27</b> | <b>136</b> | <i>Selenomonas_sp_oral_taxon_136</i> |
| <b>SE-28</b> | <b>137</b> | <i>Selenomonas_sp_oral_taxon_137</i> |
| <b>SE-29</b> | <b>137</b> | <i>Selenomonas_sp_oral_taxon_137</i> |
| <b>SE-30</b> | <b>478</b> | <i>Selenomonas_sp_oral_taxon_478</i> |
| <b>SE-31</b> | <b>151</b> | <i>Selenomonas_sputigena</i>         |
| <b>SE-32</b> | <b>151</b> | <i>Selenomonas_sputigena</i>         |
| <b>SE-33</b> | <b>151</b> | <i>Selenomonas_sputigena</i>         |
| <b>SH-01</b> | <b>95</b>  | <i>Shuttleworthia_satelles</i>       |
| <b>SI-01</b> | <b>683</b> | <i>Simonsiella_muelleri</i>          |
| <b>SL-01</b> | <b>602</b> | <i>Slackia_exigua</i>                |
| <b>SN-01</b> | <b>844</b> | <i>Sneathia_amnionii</i>             |

|              |            |                                         |
|--------------|------------|-----------------------------------------|
| <b>SN-02</b> | <b>837</b> | <i>Sneathia_sanguinegens</i>            |
| <b>SO-01</b> | <b>678</b> | <i>Solobacterium_moorei</i>             |
| <b>SR-01</b> | <b>345</b> | SR1[G-1]_sp_oral_taxon_345              |
| <b>SR-02</b> | <b>874</b> | SR1[G-1]_sp_oral_taxon_874              |
| <b>SR-03</b> | <b>875</b> | SR1[G-1]_sp_oral_taxon_875              |
| <b>ST-03</b> | <b>663</b> | <i>Stenotrophomonas_maltophilia</i>     |
| <b>ST-04</b> | <b>419</b> | <i>Stomatobaculum_longum</i>            |
| <b>ST-05</b> | <b>97</b>  | <i>Stomatobaculum_sp_oral_taxon_097</i> |
| <b>ST-06</b> | <b>373</b> | <i>Stomatobaculum_sp_oral_taxon_373</i> |
| <b>ST-07</b> | <b>910</b> | <i>Stomatobaculum_sp_oral_taxon_910</i> |
| <b>ST-08</b> | <b>537</b> | <i>Streptococcus_agalactiae</i>         |
| <b>ST-09</b> | <b>543</b> | <i>Streptococcus_anginosus</i>          |
| <b>ST-10</b> | <b>576</b> | <i>Streptococcus_constellatus</i>       |
| <b>ST-11</b> | <b>578</b> | <i>Streptococcus_cristatus</i>          |
| <b>ST-12</b> | <b>594</b> | <i>Streptococcus_downei</i>             |
| <b>ST-14</b> | <b>644</b> | <i>Streptococcus_intermedius</i>        |
| <b>ST-15</b> | <b>686</b> | <i>Streptococcus_mutans</i>             |
| <b>ST-16</b> | <b>411</b> | <i>Streptococcus_parasanguinis_II</i>   |
| <b>ST-18</b> | <b>745</b> | <i>Streptococcus_pyogenes</i>           |
| <b>ST-20</b> | <b>758</b> | <i>Streptococcus_sanguinis</i>          |
| <b>ST-21</b> | <b>768</b> | <i>Streptococcus_sobrinus</i>           |
| <b>ST-22</b> | <b>64</b>  | <i>Streptococcus_sp_oral_taxon_064</i>  |
| <b>ST-23</b> | <b>66</b>  | <i>Streptococcus_sp_oral_taxon_066</i>  |
| <b>ST-24</b> | <b>68</b>  | <i>Streptococcus_sp_oral_taxon_068</i>  |
| <b>ST-25</b> | <b>69</b>  | <i>Streptococcus_sp_oral_taxon_069</i>  |
| <b>ST-26</b> | <b>431</b> | <i>Streptococcus_sp_oral_taxon_431</i>  |

|              |            |                                                      |
|--------------|------------|------------------------------------------------------|
| <b>ST-27</b> | <b>486</b> | <i>Streptococcus_sp_oral_taxon_486</i>               |
| <b>ST-28</b> | <b>487</b> | <i>Streptococcus_sp_oral_taxon_487</i>               |
| <b>ST-29</b> | <b>663</b> | <i>Stenotrophomonas_maltophilia</i>                  |
| <b>SY-01</b> | <b>435</b> | <i>Syntrophomonadaceae[8][G-1]_sp_oral_taxon_435</i> |
| <b>TA-01</b> | <b>613</b> | <i>Tannerella_forsythia</i>                          |
| <b>TA-02</b> | <b>286</b> | <i>Tannerella_sp_oral_taxon_286</i>                  |
| <b>TA-03</b> | <b>808</b> | <i>Tannerella_sp_oral_taxon_808</i>                  |
| <b>TA-04</b> | <b>916</b> | <i>Tannerella_sp_oral_taxon_916</i>                  |
| <b>TA-05</b> | <b>916</b> | <i>Tannerella_sp_oral_taxon_916</i>                  |
| <b>TA-06</b> | <b>916</b> | <i>Tannerella_sp_oral_taxon_916</i>                  |
| <b>TA-07</b> | <b>916</b> | <i>Tannerella_sp_oral_taxon_916</i>                  |
| <b>TM-01</b> | <b>346</b> | TM7[G-1]_sp_oral_taxon_346                           |
| <b>TM-02</b> | <b>347</b> | TM7[G-1]_sp_oral_taxon_347                           |
| <b>TM-03</b> | <b>348</b> | TM7[G-1]_sp_oral_taxon_348                           |
| <b>TM-04</b> | <b>349</b> | TM7[G-1]_sp_oral_taxon_349                           |
| <b>TM-05</b> | <b>352</b> | TM7[G-1]_sp_oral_taxon_352                           |
| <b>TM-06</b> | <b>353</b> | TM7[G-1]_sp_oral_taxon_353                           |
| <b>TM-07</b> | <b>488</b> | TM7[G-1]_sp_oral_taxon_488                           |
| <b>TM-08</b> | <b>350</b> | TM7[G-2]_sp_oral_taxon_350                           |
| <b>TM-09</b> | <b>351</b> | TM7[G-3]_sp_oral_taxon_351                           |
| <b>TM-10</b> | <b>355</b> | TM7[G-4]_sp_oral_taxon_355                           |
| <b>TM-11</b> | <b>356</b> | TM7[G-5]_sp_oral_taxon_356                           |
| <b>TM-12</b> | <b>437</b> | TM7[G-5]_sp_oral_taxon_437                           |
| <b>TM-13</b> | <b>348</b> | TM7[G-1]_sp_oral_taxon_348                           |
| <b>TR-01</b> | <b>541</b> | <i>Treponema_amylovorum</i>                          |
| <b>TR-02</b> | <b>584</b> | <i>Treponema_denticola</i>                           |

|       |     |                                    |
|-------|-----|------------------------------------|
| TR-03 | 584 | <i>Treponema_denticola</i>         |
| TR-04 | 653 | <i>Treponema_lecithinolyticum</i>  |
| TR-05 | 664 | <i>Treponema_maltophilum</i>       |
| TR-06 | 805 | <i>Treponema_pallidum</i>          |
| TR-07 | 724 | <i>Treponema_parvum</i>            |
| TR-08 | 725 | <i>Treponema_pectinovorum</i>      |
| TR-09 | 743 | <i>Treponema_putidum</i>           |
| TR-10 | 769 | <i>Treponema_socranskii</i>        |
| TR-11 | 769 | <i>Treponema_socranskii</i>        |
| TR-12 | 226 | <i>Treponema_sp_oral_taxon_226</i> |
| TR-13 | 227 | <i>Treponema_sp_oral_taxon_227</i> |
| TR-14 | 228 | <i>Treponema_sp_oral_taxon_228</i> |
| TR-15 | 230 | <i>Treponema_sp_oral_taxon_230</i> |
| TR-17 | 232 | <i>Treponema_sp_oral_taxon_232</i> |
| TR-18 | 234 | <i>Treponema_sp_oral_taxon_234</i> |
| TR-19 | 235 | <i>Treponema_sp_oral_taxon_235</i> |
| TR-20 | 236 | <i>Treponema_sp_oral_taxon_236</i> |
| TR-21 | 238 | <i>Treponema_sp_oral_taxon_238</i> |
| TR-22 | 239 | <i>Treponema_sp_oral_taxon_239</i> |
| TR-23 | 242 | <i>Treponema_sp_oral_taxon_242</i> |
| TR-24 | 246 | <i>Treponema_sp_oral_taxon_246</i> |
| TR-25 | 247 | <i>Treponema_sp_oral_taxon_247</i> |
| TR-26 | 249 | <i>Treponema_sp_oral_taxon_249</i> |
| TR-27 | 250 | <i>Treponema_sp_oral_taxon_250</i> |
| TR-28 | 252 | <i>Treponema_sp_oral_taxon_252</i> |
| TR-29 | 253 | <i>Treponema_sp_oral_taxon_253</i> |

|              |            |                                    |
|--------------|------------|------------------------------------|
| <b>TR-30</b> | <b>254</b> | <i>Treponema_sp_oral_taxon_254</i> |
| <b>TR-31</b> | <b>255</b> | <i>Treponema_sp_oral_taxon_255</i> |
| <b>TR-32</b> | <b>256</b> | <i>Treponema_sp_oral_taxon_256</i> |
| <b>TR-33</b> | <b>257</b> | <i>Treponema_sp_oral_taxon_257</i> |
| <b>TR-34</b> | <b>258</b> | <i>Treponema_sp_oral_taxon_258</i> |
| <b>TR-35</b> | <b>260</b> | <i>Treponema_sp_oral_taxon_260</i> |
| <b>TR-36</b> | <b>262</b> | <i>Treponema_sp_oral_taxon_262</i> |
| <b>TR-37</b> | <b>263</b> | <i>Treponema_sp_oral_taxon_263</i> |
| <b>TR-38</b> | <b>264</b> | <i>Treponema_sp_oral_taxon_264</i> |
| <b>TR-39</b> | <b>265</b> | <i>Treponema_sp_oral_taxon_265</i> |
| <b>TR-40</b> | <b>268</b> | <i>Treponema_sp_oral_taxon_268</i> |
| <b>TR-41</b> | <b>268</b> | <i>Treponema_sp_oral_taxon_268</i> |
| <b>TR-42</b> | <b>269</b> | <i>Treponema_sp_oral_taxon_269</i> |
| <b>TR-43</b> | <b>270</b> | <i>Treponema_sp_oral_taxon_270</i> |
| <b>TR-44</b> | <b>271</b> | <i>Treponema_sp_oral_taxon_271</i> |
| <b>TR-45</b> | <b>490</b> | <i>Treponema_sp_oral_taxon_490</i> |
| <b>TR-46</b> | <b>508</b> | <i>Treponema_sp_oral_taxon_508</i> |
| <b>TR-47</b> | <b>517</b> | <i>Treponema_sp_oral_taxon_517</i> |
| <b>TR-48</b> | <b>518</b> | <i>Treponema_sp_oral_taxon_518</i> |
| <b>TR-49</b> | <b>29</b>  | <i>Treponema_vincentii</i>         |
| <b>TR-50</b> | <b>769</b> | <i>Treponema_socranskii</i>        |
| <b>TR-51</b> | <b>769</b> | <i>Treponema_socranskii</i>        |
| <b>TR-52</b> | <b>228</b> | <i>Treponema_sp_oral_taxon_228</i> |
| <b>TR-53</b> | <b>262</b> | <i>Treponema_sp_oral_taxon_262</i> |
| <b>TR-54</b> | <b>508</b> | <i>Treponema_sp_oral_taxon_508</i> |
| <b>TU-01</b> | <b>832</b> | <i>Turicella_otitidis</i>          |



|               |            |                                               |
|---------------|------------|-----------------------------------------------|
| <b>VA-01</b>  | <b>717</b> | <i>Variovorax_paradoxus</i>                   |
| <b>VE-02</b>  | <b>887</b> | <i>Veillonella_denticariosi</i>               |
| <b>VE-03</b>  | <b>160</b> | <i>Veillonella_dispar</i>                     |
| <b>VE-05</b>  | <b>161</b> | <i>Veillonella_parvula</i>                    |
| <b>VE-06</b>  | <b>161</b> | <i>Veillonella_parvula</i>                    |
| <b>VE-07</b>  | <b>158</b> | <i>Veillonella_rogosae</i>                    |
| <b>VE-08</b>  | <b>780</b> | <i>Veillonella_sp_oral_taxon_780</i>          |
| <b>VE-09</b>  | <b>917</b> | <i>Veillonella_sp_oral_taxon_917</i>          |
| <b>VE-10</b>  | <b>129</b> | <i>Veillonellaceae[G-1]_sp_oral_taxon_129</i> |
| <b>VE-12</b>  | <b>135</b> | <i>Veillonellaceae[G-1]_sp_oral_taxon_135</i> |
| <b>VE-13</b>  | <b>145</b> | <i>Veillonellaceae[G-1]_sp_oral_taxon_145</i> |
| <b>VE-14</b>  | <b>148</b> | <i>Veillonellaceae[G-1]_sp_oral_taxon_148</i> |
| <b>VE-15</b>  | <b>155</b> | <i>Veillonellaceae[G-1]_sp_oral_taxon_155</i> |
| <b>VE-16</b>  | <b>483</b> | <i>Veillonellaceae[G-1]_sp_oral_taxon_483</i> |
| <b>VE-17</b>  | <b>918</b> | <i>Veillonellaceae[G-1]_sp_oral_taxon_918</i> |
| <b>VE-18</b>  | <b>887</b> | <i>Veillonella_denticariosi</i>               |
| <b>VE-19</b>  | <b>155</b> | <i>Veillonellaceae[G-1]_sp_oral_taxon_155</i> |
| <b>VE-20</b>  | <b>524</b> | <i>Veillonella_atypica</i>                    |
| <b>VE-21</b>  | <b>524</b> | <i>Veillonella_atypica</i>                    |
| <b>GP-001</b> |            | <i>Achromobacter_Genus_probe</i>              |
| <b>GP-002</b> |            | <i>Acinetobacter_Genus_probe</i>              |
| <b>GP-097</b> |            | <i>Actinomyces_Genus_probe_1</i>              |
| <b>GP-098</b> |            | <i>Actinomyces_Genus_probe_2</i>              |
| <b>GP-003</b> |            | <i>Actinomyces_Genus_probe_3</i>              |
| <b>GP-004</b> |            | <i>Actinomyces_Genus_probe_4</i>              |
| <b>GP-099</b> |            | <i>Aggregatibacter_Genus_probe_1</i>          |

|               |                                       |
|---------------|---------------------------------------|
| <b>GP-100</b> | <i>Aggregatibacter_Genus_probe_2</i>  |
| <b>GP-005</b> | <i>Alloprevotella_Genus_probe</i>     |
| <b>GP-101</b> | <i>Anaerococcus_Genus_probe_1</i>     |
| <b>GP-006</b> | <i>Anaerococcus_Genus_probe_2</i>     |
| <b>GP-007</b> | <i>Aquamicrobium_Genus_probe</i>      |
| <b>GP-008</b> | <i>Arcanobacterium_Genus_probe</i>    |
| <b>GP-009</b> | <i>Atopobium_Genus_probe</i>          |
| <b>GP-010</b> | <i>Bacteroides_Genus_probe</i>        |
| <b>GP-011</b> | <i>Bacteroidetes[G-3]_Genus_probe</i> |
| <b>GP-012</b> | <i>Bacteroidetes[G-5]_Genus_probe</i> |
| <b>GP-013</b> | <i>Bartonella_Genus_probe</i>         |
| <b>GP-014</b> | <i>Bifidobacterium_Genus_probe_1</i>  |
| <b>GP-015</b> | <i>Bifidobacterium_Genus_probe_2</i>  |
| <b>GP-016</b> | <i>Bordetella_Genus_probe</i>         |
| <b>GP-017</b> | <i>Brevundimonas_Genus_probe</i>      |
| <b>GP-018</b> | <i>Burkholderia_Genus_probe</i>       |
| <b>GP-102</b> | <i>Campylobacter_Genus_probe_1</i>    |
| <b>GP-019</b> | <i>Campylobacter_Genus_probe_2</i>    |
| <b>GP-103</b> | <i>Capnocytophaga_Genus_probe_1</i>   |
| <b>GP-020</b> | <i>Capnocytophaga_Genus_probe_2</i>   |
| <b>GP-021</b> | <i>Capnocytophaga_Genus_probe_3</i>   |
| <b>GP-022</b> | <i>Cardiobacterium_Genus_probe</i>    |
| <b>GP-023</b> | <i>Catonella_Genus_probe</i>          |
| <b>GP-024</b> | <i>Chlamydophila_Genus_probe</i>      |
| <b>GP-025</b> | <i>Corynebacterium_Genus_probe</i>    |
| <b>GP-026</b> | <i>Desulfobulbus_Genus_probe</i>      |

|               |                                         |
|---------------|-----------------------------------------|
| <b>GP-093</b> | <i>Dialister_Genus_probe_1</i>          |
| <b>GP-094</b> | <i>Dialister_Genus_probe_2</i>          |
| <b>GP-028</b> | <i>Dietzia_Genus_probe</i>              |
| <b>GP-029</b> | <i>Eggerthella_Genus_probe</i>          |
| <b>GP-105</b> | <i>Enterococcus_Genus_probe_1</i>       |
| <b>GP-106</b> | <i>Enterococcus_Genus_probe_2</i>       |
| <b>GP-030</b> | <i>Enterococcus_Genus_probe_3</i>       |
| <b>GP-031</b> | <i>Erysipelothrichaceae_Genus_probe</i> |
| <b>GP-032</b> | <i>Erysipelothrix_Genus_probe</i>       |
| <b>GP-033</b> | <i>Escherichia_Genus_probe</i>          |
| <b>GP-034</b> | <i>Eubacterium_Genus_probe_1</i>        |
| <b>GP-035</b> | <i>Eubacterium_Genus_probe_2</i>        |
| <b>GP-036</b> | <i>Filifactor_Genus_probe</i>           |
| <b>GP-107</b> | <i>Fretibacterium_Genus_probe_1</i>     |
| <b>GP-108</b> | <i>Fretibacterium_Genus_probe_2</i>     |
| <b>GP-037</b> | <i>Fretibacterium_Genus_probe_3</i>     |
| <b>GP-109</b> | <i>Fusobacterium_Genus_probe_1</i>      |
| <b>GP-095</b> | <i>Fusobacterium_Genus_probe_2</i>      |
| <b>GP-096</b> | <i>Fusobacterium_Genus_probe_3</i>      |
| <b>GP-038</b> | <i>Fusobacterium_Genus_probe_4</i>      |
| <b>GP-039</b> | <i>Gemella_Genus_probe</i>              |
| <b>GP-110</b> | <i>Granulicatella_Genus_probe</i>       |
| <b>GP-111</b> | <i>Haemophilus_Genus_probe_1</i>        |
| <b>GP-112</b> | <i>Haemophilus_Genus_probe_2</i>        |
| <b>GP-040</b> | <i>Haemophilus_Genus_probe_3</i>        |
| <b>GP-041</b> | <i>Helicobacter_Genus_probe</i>         |

|               |                                        |
|---------------|----------------------------------------|
| <b>GP-042</b> | <i>Johnsonella_Genus_probe</i>         |
| <b>GP-113</b> | <i>Kingella_Genus_probe_1</i>          |
| <b>GP-114</b> | <i>Kingella_Genus_probe_2</i>          |
| <b>GP-043</b> | <i>Kytococcus_Genus_probe</i>          |
| <b>GP-044</b> | <i>Lachnoanaerobaculum_Genus_probe</i> |
| <b>GP-115</b> | <i>Lactobacillus_Genus_probe_1</i>     |
| <b>GP-045</b> | <i>Lactobacillus_Genus_probe_2</i>     |
| <b>GP-046</b> | <i>Lactobacillus_Genus_probe_3</i>     |
| <b>GP-047</b> | <i>Lactobacillus_Genus_probe_4</i>     |
| <b>GP-048</b> | <i>Lactobacillus_Genus_probe_5</i>     |
| <b>GP-116</b> | <i>Leptotrichia_Genus_probe_1</i>      |
| <b>GP-117</b> | <i>Leptotrichia_Genus_probe_2</i>      |
| <b>GP-049</b> | <i>Leptotrichia_Genus_probe_3</i>      |
| <b>GP-050</b> | <i>Leptotrichia_Genus_probe_4</i>      |
| <b>GP-051</b> | <i>Leptotrichiaceae_Genus_probe</i>    |
| <b>GP-052</b> | <i>Listeria_Genus_probe</i>            |
| <b>GP-053</b> | <i>Lysinibacillus_Genus_probe</i>      |
| <b>GP-054</b> | <i>Mitsuokella_Genus_probe</i>         |
| <b>GP-055</b> | <i>Mobiluncus_Genus_probe</i>          |
| <b>GP-056</b> | <i>Mogibacterium_Genus_probe</i>       |
| <b>GP-118</b> | <i>Moraxella_Genus_probe_1</i>         |
| <b>GP-057</b> | <i>Moraxella_Genus_probe_2</i>         |
| <b>GP-058</b> | <i>Mycobacterium_Genus_probe</i>       |
| <b>GP-059</b> | <i>Mycoplasma_Genus_probe</i>          |
| <b>GP-119</b> | <i>Neisseria_Genus_probe_1</i>         |
| <b>GP-060</b> | <i>Neisseria_Genus_probe_2</i>         |

|               |                                                |
|---------------|------------------------------------------------|
| <b>GP-061</b> | <i>Olsenella_Genus_probe</i>                   |
| <b>GP-120</b> | <i>Oribacterium_Genus_probe</i>                |
| <b>GP-062</b> | <i>Paenibacillus_Genus_probe</i>               |
| <b>GP-063</b> | <i>Parvimonas_Genus_probe</i>                  |
| <b>GP-064</b> | <i>Peptoniphilus_Genus_probe</i>               |
| <b>GP-065</b> | <i>Peptostreptococcus_Genus_probe</i>          |
| <b>GP-066</b> | <i>Porphyromonas_Genus_probe_1</i>             |
| <b>GP-067</b> | <i>Porphyromonas_Genus_probe_2</i>             |
| <b>GP-068</b> | <i>Porphyromonas_Genus_probe_3</i>             |
| <b>GP-121</b> | <i>Prevotella_Genus_probe_1</i>                |
| <b>GP-069</b> | <i>Prevotella_Genus_probe_2</i>                |
| <b>GP-070</b> | <i>Propionibacterium_Genus_probe</i>           |
| <b>GP-071</b> | <i>Proteus_Genus_probe</i>                     |
| <b>GP-072</b> | <i>Pseudomonas_Genus_probe</i>                 |
| <b>GP-073</b> | <i>Rothia_Genus_probe</i>                      |
| <b>GP-074</b> | <i>Sanguibacter_Genus_probe</i>                |
| <b>GP-075</b> | <i>Scardovia_Genus_probe</i>                   |
| <b>GP-076</b> | <i>Selenomonas_&amp;_Centipeda_Genus_probe</i> |
| <b>GP-122</b> | <i>Selenomonas_Genus_probe_1</i>               |
| <b>GP-123</b> | <i>Selenomonas_Genus_probe_2</i>               |
| <b>GP-077</b> | <i>Slackia_Genus_probe</i>                     |
| <b>GP-078</b> | <i>Sphingomonas_Genus_probe</i>                |
| <b>GP-079</b> | <i>SR1_Genus_probe</i>                         |
| <b>GP-124</b> | <i>Staphylococcus_Genus_probe_1</i>            |
| <b>GP-125</b> | <i>Staphylococcus_Genus_probe_2</i>            |
| <b>GP-080</b> | <i>Staphylococcus_Genus_probe_3</i>            |

|               |                                       |
|---------------|---------------------------------------|
| <b>GP-126</b> | <i>Streptococcus</i> _Genus_probe_1   |
| <b>GP-127</b> | <i>Streptococcus</i> _Genus_probe_2   |
| <b>GP-128</b> | <i>Streptococcus</i> _Genus_probe_3   |
| <b>GP-081</b> | <i>Streptococcus</i> _Genus_probe_4   |
| <b>GP-082</b> | <i>Tannerella</i> _Genus_probe        |
| <b>GP-083</b> | TM7_Genus_probe                       |
| <b>GP-129</b> | <i>Treponema</i> _Genus_probe_1       |
| <b>GP-084</b> | <i>Treponema</i> _Genus_probe_2       |
| <b>GP-085</b> | <i>Treponema</i> _Genus_probe_3       |
| <b>GP-086</b> | <i>Treponema</i> _Genus_probe_4       |
| <b>GP-087</b> | <i>Treponema</i> _Genus_probe_5       |
| <b>GP-088</b> | <i>Treponema</i> _Genus_probe_6       |
| <b>GP-130</b> | <i>Veillonella</i> _Genus_probe_1     |
| <b>GP-089</b> | <i>Veillonella</i> _Genus_probe_2     |
| <b>GP-131</b> | <i>Veillonellaceae</i> _Genus_probe_1 |
| <b>GP-091</b> | <i>Veillonellaceae</i> _Genus_probe_2 |
| <b>GP-090</b> | <i>Veillonellaceae</i> _Genus_probe_3 |
| <b>GP-092</b> | <i>Yersinia</i> _Genus_probe          |

## S2: Probes identified

| Organism Name                          | Periodontitis          |                           | Oral Health            |                           | Dental Caries          |                           |
|----------------------------------------|------------------------|---------------------------|------------------------|---------------------------|------------------------|---------------------------|
|                                        | Presence frequency (%) | Proportional presence (%) | Presence frequency (%) | Proportional presence (%) | Presence frequency (%) | Proportional presence (%) |
| <i>Prevotella_melaninogenica</i>       | 100.0                  | 18.25286                  | 100                    | 17.47872                  | 100                    | 11.84720                  |
| <i>Streptococcus_Genus_probe_4</i>     | 100.0                  | 5.95414                   | 100                    | 13.74330                  | 100                    | 14.29662                  |
| <i>Haemophilus_parainfluenzae</i>      | 100.0                  | 3.38356                   | 100                    | 5.99407                   | 100                    | 3.44279                   |
| <i>Neisseria_Genus_probe_2</i>         | 100.0                  | 2.70825                   | 100                    | 3.39667                   | 90                     | 4.77040                   |
| <i>Rothia_mucilaginosa</i>             | 100.0                  | 3.16989                   | 100                    | 3.30132                   | 100                    | 2.89202                   |
| <i>Fusobacterium_periodonticum</i>     | 100.0                  | 4.39686                   | 100                    | 2.99122                   | 100                    | 2.06796                   |
| <i>Prevotella_histicola</i>            | 100.0                  | 1.28407                   | 100                    | 2.00763                   | 90                     | 5.24591                   |
| <i>Prevotella_salivae</i>              | 100.0                  | 2.43977                   | 100                    | 1.61312                   | 100                    | 2.13078                   |
| <i>Veillonella_atypica</i>             | 100.0                  | 1.42391                   | 100                    | 0.92654                   | 100                    | 1.93314                   |
| <i>Veillonella_Genus_probe_2</i>       | 100.0                  | 1.63955                   | 100                    | 1.31919                   | 100                    | 0.95407                   |
| <i>Granulicatella_Genus_probe</i>      | 100.0                  | 0.52946                   | 100                    | 1.23138                   | 100                    | 1.57606                   |
| <i>Prevotella_pallens</i>              | 80.0                   | 1.48744                   | 100                    | 1.29618                   | 100                    | 0.61811                   |
| <i>Porphyromonas_sp_oral_taxon_279</i> | 90.0                   | 1.35483                   | 100                    | 1.60193                   | 90                     | 0.34606                   |
| <i>Veillonella_atypica</i>             | 90.0                   | 0.89864                   | 100                    | 0.80093                   | 100                    | 1.36792                   |
| <i>Leptotrichia_sp_oral_taxon_417</i>  | 90.0                   | 1.50068                   | 100                    | 0.55866                   | 100                    | 0.50460                   |

|                                              |       |         |     |         |     |         |
|----------------------------------------------|-------|---------|-----|---------|-----|---------|
| <i>Neisseria flavescens</i>                  | 90.0  | 1.47907 | 90  | 0.21970 | 80  | 0.11866 |
| <i>Fusobacterium</i> _Genus_<br>probe_4      | 100.0 | 1.52205 | 100 | 0.41519 | 100 | 0.45509 |
| <i>Prevotella</i> _Genus_<br>probe_1         | 90.0  | 0.57107 | 100 | 1.13557 | 90  | 0.52981 |
| <i>Veillonella rogosae</i>                   | 100.0 | 0.56475 | 100 | 0.67473 | 100 | 0.26099 |
| <i>Neisseria pharyngis</i>                   | 50.0  | 0.08896 | 20  | 0.00397 | 30  | 0.00538 |
| <i>Oribacterium sinus</i>                    | 90.0  | 0.36486 | 100 | 0.46593 | 100 | 0.54447 |
| <i>Megasphaera microneu-<br/>cifformis</i>   | 80.0  | 0.46762 | 100 | 0.39019 | 100 | 0.52775 |
| <i>Gemella sanguinis</i>                     | 100.0 | 0.36421 | 100 | 0.46916 | 100 | 0.43328 |
| <i>Streptococcus sanguini-<br/>s</i>         | 100.0 | 0.09620 | 100 | 0.22660 | 100 | 0.68544 |
| <i>Campylobacter concisu-<br/>s</i>          | 100.0 | 0.23991 | 100 | 0.35018 | 100 | 0.64430 |
| <i>Prevotella veroralis</i>                  | 100.0 | 0.23101 | 100 | 0.28270 | 90  | 0.17879 |
| <i>Leptotrichia</i> _sp_<br>oral_taxon_221   | 80.0  | 0.70317 | 100 | 0.18213 | 80  | 0.23045 |
| <i>Gemella haemolysans</i>                   | 90.0  | 0.14080 | 100 | 0.34291 | 100 | 0.48169 |
| <i>Prevotella scopos</i>                     | 30.0  | 0.11558 | 60  | 0.86638 | 50  | 0.01942 |
| <i>Prevotella pallens</i>                    | 90.0  | 0.61496 | 100 | 0.14485 | 90  | 0.15732 |
| <i>Leptotrichia</i> _Genus_<br>probe_3       | 90.0  | 0.50724 | 80  | 0.12597 | 100 | 0.12758 |
| TM7[G-<br>1]_sp_<br>oral_taxon_352           | 90.0  | 0.24319 | 90  | 0.44220 | 80  | 0.11531 |
| <i>Leptotrichia</i> _sp_<br>oral_taxon_215   | 90.0  | 0.31763 | 90  | 0.28445 | 70  | 0.12941 |
| <i>Alloprevotella</i> _sp_<br>oral_taxon_914 | 100.0 | 0.21394 | 100 | 0.41948 | 90  | 0.10811 |
| <i>Veillonella dispar</i>                    | 100.0 | 0.18766 | 100 | 0.24573 | 100 | 0.27708 |



|                                                |       |         |     |         |     |         |
|------------------------------------------------|-------|---------|-----|---------|-----|---------|
| <i>Oribacterium_sp_oral_taxon_108</i>          | 90.0  | 0.16365 | 100 | 0.15392 | 100 | 0.37844 |
| <i>Streptococcus_Genus_probe_1</i>             | 100.0 | 0.06337 | 100 | 0.15910 | 100 | 0.34426 |
| <i>Leptotrichiaceae[G-1]_sp_oral_taxon_210</i> | 30.0  | 0.48464 | 0   | 0.00000 | 0   | 0.00000 |
| <i>Actinomyces_Genus_probe_4</i>               | 100.0 | 0.13342 | 100 | 0.13536 | 100 | 0.28146 |
| <i>Rothia_dentocariosa</i>                     | 100.0 | 0.17263 | 100 | 0.19546 | 100 | 0.23238 |
| <i>Veillonella_Genus_probe_1</i>               | 100.0 | 0.21533 | 100 | 0.20782 | 100 | 0.18620 |
| <i>Rothia_Genus_probe</i>                      | 100.0 | 0.17188 | 100 | 0.17062 | 100 | 0.17572 |
| <i>Veillonella_sp_oral_taxon_917</i>           | 20.0  | 0.00995 | 30  | 0.00388 | 90  | 0.43696 |
| <i>Catonella_Genus_probe</i>                   | 90.0  | 0.18536 | 100 | 0.19566 | 100 | 0.16043 |
| <i>Alloprevotella_tannerae</i>                 | 80.0  | 0.23858 | 60  | 0.10828 | 80  | 0.18688 |
| <i>Haemophilus_parahaemolyticus</i>            | 60.0  | 0.01774 | 80  | 0.03623 | 60  | 0.44790 |
| <i>Prevotella_nigrescens</i>                   | 90.0  | 0.18069 | 100 | 0.03731 | 100 | 0.10923 |
| <i>Prevotella_Genus_probe_2</i>                | 100.0 | 0.21888 | 100 | 0.07060 | 100 | 0.15286 |
| <i>Veillonella_parvula</i>                     | 90.0  | 0.16033 | 100 | 0.12395 | 100 | 0.16921 |
| <i>Alloprevotella_Genus_probe</i>              | 80.0  | 0.15843 | 100 | 0.20600 | 90  | 0.06216 |
| <i>Actinomyces_sp_oral_taxon_172</i>           | 100.0 | 0.05809 | 90  | 0.08098 | 70  | 0.21431 |
| <i>Porphyromonas_gingivalis</i>                | 70.0  | 0.27993 | 0   | 0.00000 | 10  | 0.00170 |
| <i>Prevotella_oris</i>                         | 90.0  | 0.14829 | 100 | 0.05348 | 100 | 0.18704 |

|                                                |       |         |     |         |     |         |
|------------------------------------------------|-------|---------|-----|---------|-----|---------|
| <i>Stomatobaculum_sp_oral_taxon_097</i>        | 80.0  | 0.24189 | 90  | 0.10476 | 50  | 0.07008 |
| <i>Parvimonas_Genus_probe</i>                  | 100.0 | 0.26122 | 90  | 0.09249 | 100 | 0.04455 |
| <i>Fusobacterium_nucleatum_subsp_nucleatum</i> | 90.0  | 0.19661 | 70  | 0.00378 | 100 | 0.01278 |
| <i>Stomatobaculum_longum</i>                   | 90.0  | 0.14744 | 80  | 0.06565 | 90  | 0.16347 |
| <i>Alloprevotella_sp_oral_taxon_473</i>        | 70.0  | 0.05566 | 70  | 0.14755 | 70  | 0.13966 |
| <i>Aggregatibacter_Genus_probe_2</i>           | 60.0  | 0.08236 | 70  | 0.05714 | 60  | 0.19543 |
| <i>Lautropia_mirabilis</i>                     | 90.0  | 0.02637 | 100 | 0.04093 | 100 | 0.10574 |
| <i>Leptotrichia_sp_oral_taxon_218</i>          | 40.0  | 0.21408 | 60  | 0.04210 | 40  | 0.07728 |
| <i>Leptotrichia_hongkongensis</i>              | 90.0  | 0.19776 | 100 | 0.02579 | 100 | 0.09700 |
| <i>Eubacterium[11][G-1]_sulci</i>              | 100.0 | 0.10360 | 90  | 0.14631 | 50  | 0.07695 |
| <i>Campylobacter_Genus_probe_2</i>             | 100.0 | 0.08167 | 100 | 0.08649 | 100 | 0.12479 |
| <i>Solobacterium_moorei</i>                    | 100.0 | 0.06512 | 100 | 0.11013 | 100 | 0.11707 |
| <i>Bergeyella_sp_oral_taxon_322</i>            | 100.0 | 0.07288 | 100 | 0.12352 | 100 | 0.07784 |
| <i>Actinomyces_sp_oral_taxon_181</i>           | 80.0  | 0.01068 | 80  | 0.08830 | 100 | 0.16429 |
| <i>Porphyromonas_endodontalis</i>              | 80.0  | 0.17869 | 50  | 0.01197 | 40  | 0.00121 |
| <i>Prevotella_intermedia</i>                   | 60.0  | 0.08421 | 40  | 0.00532 | 50  | 0.16267 |
| <i>Lachnoanaerobaculum_orale</i>               | 90.0  | 0.09377 | 100 | 0.08087 | 100 | 0.09099 |

|                                         |       |         |     |         |     |         |
|-----------------------------------------|-------|---------|-----|---------|-----|---------|
| <i>Lachnoanaerobaculum_umeaense</i>     | 100.0 | 0.12101 | 100 | 0.08464 | 100 | 0.06604 |
| <i>Aggregatibacter_Genus_probe_1</i>    | 100.0 | 0.10640 | 90  | 0.03081 | 60  | 0.09784 |
| <i>Leptotrichia_Genus_probe_4</i>       | 100.0 | 0.12163 | 100 | 0.05044 | 100 | 0.07228 |
| <i>Corynebacterium_matruchotii</i>      | 100.0 | 0.08672 | 100 | 0.02110 | 90  | 0.12275 |
| <i>Neisseria_elongata</i>               | 90.0  | 0.11964 | 80  | 0.00977 | 80  | 0.08393 |
| <i>Rothia_aeria</i>                     | 100.0 | 0.04138 | 100 | 0.02708 | 90  | 0.11026 |
| <i>Peptostreptococcus_stomatis</i>      | 90.0  | 0.13318 | 90  | 0.05619 | 80  | 0.03764 |
| SR1[G-1]_sp_oral_taxon_875              | 50.0  | 0.05156 | 30  | 0.17893 | 20  | 0.01198 |
| <i>Selenomonas_sp_oral_taxon_149</i>    | 80.0  | 0.08979 | 100 | 0.06412 | 100 | 0.05997 |
| <i>Alloprevotella_sp_oral_taxon_308</i> | 80.0  | 0.02263 | 90  | 0.17884 | 100 | 0.03818 |
| <i>Granulicatella_elegans</i>           | 70.0  | 0.02855 | 80  | 0.10439 | 90  | 0.09462 |
| <i>Oribacterium_sp_oral_taxon_108</i>   | 80.0  | 0.10652 | 90  | 0.08701 | 40  | 0.02348 |
| <i>Leptotrichia_wadei</i>               | 80.0  | 0.10352 | 70  | 0.01398 | 90  | 0.10181 |
| <i>Porphyromonas_sp_oral_taxon_279</i>  | 90.0  | 0.10300 | 60  | 0.08151 | 40  | 0.03341 |
| <i>Prevotella_denticola</i>             | 70.0  | 0.04322 | 90  | 0.03013 | 100 | 0.12022 |
| <i>Gemella_Genus_probe</i>              | 90.0  | 0.06046 | 100 | 0.08202 | 100 | 0.06018 |
| <i>Leptotrichia_sp_oral_taxon_212</i>   | 100.0 | 0.10467 | 70  | 0.01932 | 80  | 0.07373 |
| <i>Actinomyces_odontolyticus</i>        | 90.0  | 0.03467 | 90  | 0.10133 | 100 | 0.07474 |
| <i>Atopobium_parvulum</i>               | 90.0  | 0.04825 | 60  | 0.06232 | 60  | 0.00613 |

|                                               |       |         |     |         |     |         |
|-----------------------------------------------|-------|---------|-----|---------|-----|---------|
| <i>Dialister_invisus</i>                      | 100.0 | 0.04837 | 100 | 0.01648 | 100 | 0.12130 |
| <i>Prevotella_sp_oral_taxon_309</i>           | 70.0  | 0.07366 | 90  | 0.10692 | 80  | 0.01733 |
| TM7_Genus_probe                               | 100.0 | 0.08288 | 90  | 0.06319 | 90  | 0.04345 |
| <i>Prevotella_oulorum</i>                     | 70.0  | 0.05223 | 100 | 0.02327 | 100 | 0.09871 |
| <i>Haemophilus_Genus_probe_3</i>              | 80.0  | 0.05484 | 80  | 0.02468 | 100 | 0.07505 |
| <i>Fusobacterium_Genus_probe_3</i>            | 100.0 | 0.12172 | 70  | 0.00672 | 90  | 0.03499 |
| <i>Fusobacterium_Genus_probe_2</i>            | 100.0 | 0.10941 | 100 | 0.01764 | 100 | 0.04127 |
| <i>Veillonella_denticariosi</i>               | 70.0  | 0.09854 | 80  | 0.05679 | 80  | 0.02367 |
| <i>Campylobacter_gracilis</i>                 | 80.0  | 0.08829 | 90  | 0.00953 | 100 | 0.06902 |
| <i>Parvimonas_micra</i>                       | 90.0  | 0.08381 | 80  | 0.01820 | 90  | 0.06412 |
| <i>Veillonella_sp_oral_taxon_780</i>          | 60.0  | 0.02721 | 70  | 0.10098 | 90  | 0.03586 |
| <i>Alloprevotella_rava</i>                    | 60.0  | 0.04623 | 80  | 0.09677 | 60  | 0.01244 |
| <i>Leptotrichia_shahii</i>                    | 80.0  | 0.08533 | 70  | 0.00848 | 90  | 0.05361 |
| <i>Lachnospiraceae[G-2]_sp_oral_taxon_096</i> | 80.0  | 0.05182 | 80  | 0.02618 | 40  | 0.04272 |
| <i>Bacteroidales[G-2]_sp_oral_taxon_274</i>   | 80.0  | 0.07309 | 40  | 0.00616 | 100 | 0.05516 |
| <i>Neisseria_Genus_probe_1</i>                | 40.0  | 0.01080 | 30  | 0.01617 | 50  | 0.07238 |
| <i>Aggregatibacter_sp_oral_taxon_458</i>      | 40.0  | 0.05179 | 40  | 0.00598 | 30  | 0.04184 |
| <i>Aggregatibacter_sp_oral_taxon_513</i>      | 40.0  | 0.04671 | 30  | 0.00552 | 40  | 0.07883 |
| <i>Haemophilus_sp_oral_taxon_035</i>          | 20.0  | 0.12255 | 20  | 0.00106 | 10  | 0.00020 |

|                                                  |       |         |     |         |     |         |
|--------------------------------------------------|-------|---------|-----|---------|-----|---------|
| <i>Leptotrichia_sp_oral_taxon_498</i>            | 70.0  | 0.09612 | 30  | 0.00235 | 70  | 0.01438 |
| <i>Mogibacterium_Genus_probe</i>                 | 100.0 | 0.04947 | 90  | 0.03486 | 100 | 0.02536 |
| <i>Atopobium_Genus_probe</i>                     | 100.0 | 0.03083 | 100 | 0.02394 | 90  | 0.05431 |
| <i>Prevotella_sp_oral_taxon_305</i>              | 50.0  | 0.03484 | 60  | 0.03713 | 80  | 0.02753 |
| <i>Actinomyces_graevenitzi</i>                   | 60.0  | 0.02051 | 90  | 0.02769 | 70  | 0.06936 |
| <i>Porphyromonas_Genus_probe_2</i>               | 60.0  | 0.01489 | 70  | 0.02943 | 70  | 0.05860 |
| <i>Prevotella_pleuritidis</i>                    | 40.0  | 0.02695 | 30  | 0.00125 | 70  | 0.07168 |
| <i>Filifactor_alocis</i>                         | 80.0  | 0.05124 | 20  | 0.00102 | 30  | 0.01417 |
| <i>Lachnospiraceae[G-5]_sp_oral_taxon_455</i>    | 90.0  | 0.03857 | 80  | 0.02906 | 40  | 0.02176 |
| <i>Tannerella_forsythia</i>                      | 80.0  | 0.05137 | 40  | 0.00214 | 70  | 0.01386 |
| <i>Treponema_Genus_probe_2</i>                   | 80.0  | 0.04880 | 60  | 0.00324 | 60  | 0.01150 |
| <i>Clostridiales[F-2][G-2]_sp_oral_taxon_085</i> | 90.0  | 0.01368 | 80  | 0.05467 | 70  | 0.01895 |
| <i>Corynebacterium_Genus_probe</i>               | 40.0  | 0.04448 | 60  | 0.00256 | 80  | 0.04315 |
| <i>Prevotella_shahii</i>                         | 40.0  | 0.03523 | 50  | 0.05097 | 20  | 0.00361 |
| <i>Streptococcus_Genus_probe_3</i>               | 90.0  | 0.03830 | 90  | 0.02009 | 90  | 0.02360 |
| <i>Lachnospiraceae[G-8]_sp_oral_taxon_500</i>    | 70.0  | 0.04165 | 40  | 0.00407 | 40  | 0.00408 |
| <i>Actinomyces_Genus_probe_3</i>                 | 90.0  | 0.01764 | 90  | 0.01469 | 100 | 0.02226 |
| <i>Kingella_oralis</i>                           | 80.0  | 0.02692 | 90  | 0.01192 | 100 | 0.02668 |

|                                                   |       |         |     |         |     |         |
|---------------------------------------------------|-------|---------|-----|---------|-----|---------|
| <i>Oribacterium_sp_oral_taxon_108</i>             | 60.0  | 0.02198 | 80  | 0.03294 | 60  | 0.01834 |
| <i>Streptococcus_mutans</i>                       | 40.0  | 0.00129 | 60  | 0.00914 | 100 | 0.06651 |
| <i>Selenomonas_sp_oral_taxon_136</i>              | 80.0  | 0.02738 | 70  | 0.02314 | 80  | 0.02080 |
| <i>Eubacterium</i> [11][G-3]_brachy               | 100.0 | 0.03582 | 70  | 0.00640 | 100 | 0.02615 |
| <i>Tannerella_sp_oral_taxon_286</i>               | 80.0  | 0.06018 | 40  | 0.00291 | 80  | 0.01016 |
| <i>Aggregatibacter_paraphrophilus</i>             | 40.0  | 0.01147 | 50  | 0.01578 | 40  | 0.01368 |
| <i>Selenomonas_&amp;Centipeda_Genus_probe</i>     | 90.0  | 0.04238 | 60  | 0.00469 | 100 | 0.02171 |
| <i>Dialister_pneumosintes</i>                     | 80.0  | 0.02549 | 50  | 0.00555 | 60  | 0.02913 |
| <i>Leptotrichiaceae_Genus_probe</i>               | 20.0  | 0.05037 | 0   | 0.00000 | 0   | 0.00000 |
| <i>Abiotrophia_defectiva</i>                      | 50.0  | 0.00760 | 40  | 0.01503 | 90  | 0.04219 |
| <i>Streptococcus_sp_oral_taxon_064</i>            | 80.0  | 0.00965 | 100 | 0.02217 | 100 | 0.03054 |
| <i>Porphyromonas_sp_oral_taxon_395</i>            | 60.0  | 0.02944 | 20  | 0.00246 | 30  | 0.03471 |
| <i>Capnocytophaga_leadbetteri</i>                 | 90.0  | 0.04471 | 50  | 0.00411 | 80  | 0.01418 |
| <i>Treponema_denticola</i>                        | 50.0  | 0.04016 | 0   | 0.00000 | 20  | 0.01251 |
| <i>Streptococcus_intermedius</i>                  | 90.0  | 0.01349 | 70  | 0.01761 | 100 | 0.03060 |
| <i>Prevotella_maculosa</i>                        | 100.0 | 0.02680 | 80  | 0.01296 | 100 | 0.01847 |
| <i>Clostridiales</i> [F-2][G-1]_sp_oral_taxon_075 | 70.0  | 0.01797 | 70  | 0.01780 | 80  | 0.02174 |
| <i>Leptotrichia_sp_oral_taxon_392</i>             | 70.0  | 0.04953 | 50  | 0.00413 | 30  | 0.00727 |

|                                                         |       |         |    |         |     |         |
|---------------------------------------------------------|-------|---------|----|---------|-----|---------|
| <i>Lachnoanaerobaculum_saburreum</i>                    | 60.0  | 0.03937 | 40 | 0.00305 | 100 | 0.01448 |
| <i>Treponema_amylovorum</i>                             | 30.0  | 0.05466 | 0  | 0.00000 | 10  | 0.00396 |
| <i>Prevotella_sp_oral_taxon_396</i>                     | 50.0  | 0.02862 | 50 | 0.02677 | 30  | 0.00283 |
| <i>Prevotella_sp_oral_taxon_472</i>                     | 50.0  | 0.03336 | 70 | 0.00445 | 50  | 0.00868 |
| <i>Peptostreptococcaceae[11][G-7]_sp_oral_taxon_106</i> | 30.0  | 0.02542 | 30 | 0.02106 | 30  | 0.00595 |
| <i>Haemophilus_Genus_probe_2</i>                        | 70.0  | 0.00499 | 60 | 0.01139 | 80  | 0.03915 |
| <i>Mycoplasma_faucium</i>                               | 70.0  | 0.02776 | 0  | 0.00000 | 30  | 0.00549 |
| <i>Atopobium_parvulum</i>                               | 60.0  | 0.01749 | 80 | 0.00554 | 100 | 0.03082 |
| <i>Capnocytophaga_sputigena</i>                         | 70.0  | 0.01662 | 70 | 0.00645 | 80  | 0.02308 |
| <i>Porphyromonas_sp_oral_taxon_285</i>                  | 20.0  | 0.04220 | 10 | 0.00895 | 0   | 0.00000 |
| <i>Veillonella_denticariosi</i>                         | 80.0  | 0.01343 | 80 | 0.01837 | 90  | 0.01440 |
| <i>Treponema_denticola</i>                              | 50.0  | 0.03936 | 20 | 0.00027 | 40  | 0.00736 |
| <i>Kingella_Genus_probe_1</i>                           | 50.0  | 0.01571 | 40 | 0.00225 | 90  | 0.02191 |
| <i>Eikenella_corrodens</i>                              | 90.0  | 0.02369 | 60 | 0.00653 | 100 | 0.01509 |
| <i>Gemella_morbilloorum</i>                             | 90.0  | 0.02268 | 70 | 0.00885 | 80  | 0.01571 |
| <i>Campylobacter_sp_oral_taxon_044</i>                  | 60.0  | 0.02246 | 50 | 0.01324 | 50  | 0.01482 |
| <i>Treponema_sp_oral_taxon_257</i>                      | 50.0  | 0.01060 | 10 | 0.00265 | 20  | 0.01482 |
| <i>Prevotella_intermedia</i>                            | 20.0  | 0.01212 | 0  | 0.00000 | 10  | 0.03797 |
| <i>Treponema_Genus_probe_1</i>                          | 100.0 | 0.02574 | 50 | 0.00219 | 80  | 0.01480 |

be\_6

|                                        |      |         |     |         |     |         |
|----------------------------------------|------|---------|-----|---------|-----|---------|
| <i>Corynebacterium_durum</i>           | 70.0 | 0.01241 | 90  | 0.00594 | 100 | 0.02380 |
| TM7[G-1]_sp_oral_taxon_346             | 70.0 | 0.03681 | 60  | 0.00180 | 60  | 0.00305 |
| <i>Cardiobacterium_hominis</i>         | 80.0 | 0.01517 | 50  | 0.00384 | 80  | 0.01838 |
| <i>Streptococcus_sp_oral_taxon_066</i> | 90.0 | 0.00665 | 90  | 0.01540 | 100 | 0.02053 |
| <i>Porphyromonas_Genus_probe_1</i>     | 70.0 | 0.03372 | 30  | 0.00116 | 30  | 0.00836 |
| <i>Treponema_sp_oral_taxon_270</i>     | 40.0 | 0.04046 | 0   | 0.00000 | 20  | 0.00158 |
| <i>Actinomyces_odontolyticus</i>       | 50.0 | 0.00766 | 80  | 0.01792 | 50  | 0.01534 |
| <i>Streptococcus_parasanguinis_II</i>  | 80.0 | 0.00567 | 100 | 0.01638 | 100 | 0.01490 |
| <i>Treponema_Genus_probe_3</i>         | 60.0 | 0.01954 | 10  | 0.00014 | 20  | 0.00416 |
| TM7[G-1]_sp_oral_taxon_353             | 50.0 | 0.02804 | 70  | 0.00353 | 70  | 0.00627 |
| <i>Actinomyces_sp_oral_taxon_877</i>   | 20.0 | 0.00763 | 20  | 0.02258 | 30  | 0.00824 |
| <i>Prevotella_sp_oral_taxon_526</i>    | 60.0 | 0.03870 | 10  | 0.00051 | 0   | 0.00000 |
| <i>Capnocytophaga_Genus_probe_2</i>    | 90.0 | 0.01187 | 60  | 0.00347 | 100 | 0.01863 |
| <i>Campylobacter_concissus</i>         | 60.0 | 0.01591 | 50  | 0.00404 | 90  | 0.01596 |
| <i>Capnocytophaga_gingivalis</i>       | 70.0 | 0.01578 | 30  | 0.00299 | 80  | 0.00980 |
| <i>Leptotrichia_sp_oral_taxon_526</i>  | 80.0 | 0.02103 | 70  | 0.00530 | 70  | 0.00773 |



**xon\_223**

|                                        |      |         |    |         |     |         |
|----------------------------------------|------|---------|----|---------|-----|---------|
| <i>Atopobium_rimae</i>                 | 70.0 | 0.01822 | 50 | 0.00149 | 90  | 0.01527 |
| <i>Treponema_putidum</i>               | 50.0 | 0.01392 | 30 | 0.00140 | 40  | 0.01045 |
| <i>Treponema_Genus_probe_4</i>         | 40.0 | 0.01183 | 30 | 0.00303 | 40  | 0.00920 |
| <i>Peptococcus_sp_oral_taxon_167</i>   | 70.0 | 0.01764 | 60 | 0.00727 | 40  | 0.00771 |
| <i>Prevotella_sp_oral_taxon_317</i>    | 40.0 | 0.02470 | 50 | 0.00505 | 70  | 0.00520 |
| <i>Selenomonas_sp_oral_taxon_478</i>   | 60.0 | 0.01894 | 60 | 0.00871 | 50  | 0.00675 |
| <i>Selenomonas_noxia</i>               | 40.0 | 0.01720 | 60 | 0.00906 | 60  | 0.00714 |
| <i>Leptotrichia_goodfellowii</i>       | 70.0 | 0.00977 | 60 | 0.00683 | 60  | 0.01191 |
| <i>Fretibacterium_fastidiosum</i>      | 70.0 | 0.01659 | 10 | 0.00013 | 50  | 0.01003 |
| <i>Streptococcus_sp_oral_taxon_431</i> | 70.0 | 0.00673 | 80 | 0.00979 | 100 | 0.01223 |
| <i>Capnocytophaga_granulosa</i>        | 70.0 | 0.01500 | 40 | 0.00148 | 90  | 0.00885 |
| <i>Gemella_morbillosum</i>             | 80.0 | 0.01725 | 80 | 0.00655 | 90  | 0.00615 |
| <i>Veillonella_parvula</i>             | 40.0 | 0.01366 | 40 | 0.00174 | 70  | 0.01368 |
| <i>Selenomonas_noxia</i>               | 40.0 | 0.01343 | 20 | 0.00044 | 60  | 0.01307 |
| <i>Prevotella_multiformis</i>          | 20.0 | 0.01226 | 10 | 0.00089 | 20  | 0.01517 |
| TM7[G-5]_sp_oral_taxon_437             | 60.0 | 0.01493 | 30 | 0.00105 | 90  | 0.00481 |
| <i>Oribacterium_Genus_probe</i>        | 70.0 | 0.00625 | 60 | 0.00238 | 100 | 0.01758 |
| <i>Treponema_sp_oral_taxon_262</i>     | 20.0 | 0.00454 | 0  | 0.00000 | 40  | 0.01712 |

|                                                          |      |         |    |         |     |         |
|----------------------------------------------------------|------|---------|----|---------|-----|---------|
| <i>Eubacterium_Genus_probe_1</i>                         | 70.0 | 0.01380 | 70 | 0.00754 | 50  | 0.00386 |
| TM7[G-3]_sp_oral_taxon_351                               | 70.0 | 0.00745 | 60 | 0.01069 | 70  | 0.00680 |
| <i>Leptotrichia_sp_oral_taxon_219</i>                    | 70.0 | 0.01200 | 60 | 0.00472 | 70  | 0.00777 |
| <i>Peptostreptococcus_Genus_probe</i>                    | 90.0 | 0.01617 | 70 | 0.00497 | 50  | 0.00174 |
| <i>Streptococcus_anginosus</i>                           | 50.0 | 0.00557 | 30 | 0.00104 | 70  | 0.01772 |
| <i>Mitsuokella_sp_oral_taxon_521</i>                     | 40.0 | 0.00476 | 30 | 0.00329 | 40  | 0.00475 |
| <i>Cardiobacterium_valvarum</i>                          | 60.0 | 0.00625 | 50 | 0.00289 | 70  | 0.00749 |
| SR1[G-1]_sp_oral_taxon_345                               | 50.0 | 0.01242 | 30 | 0.00962 | 10  | 0.00099 |
| <i>Prevotella_dentalis</i>                               | 50.0 | 0.02146 | 10 | 0.00030 | 20  | 0.00201 |
| <i>Treponema_sp_oral_taxon_508</i>                       | 20.0 | 0.00091 | 0  | 0.00000 | 10  | 0.00231 |
| <i>Prevotella_fusca</i>                                  | 20.0 | 0.02306 | 20 | 0.00040 | 0   | 0.00000 |
| <i>Streptococcus_sp_oral_taxon_486</i>                   | 70.0 | 0.00525 | 90 | 0.00821 | 100 | 0.00752 |
| <i>Prevotella_baroniae</i>                               | 50.0 | 0.01508 | 10 | 0.00013 | 30  | 0.00686 |
| <i>Streptococcus_sobrinus</i>                            | 0.0  | 0.00000 | 10 | 0.00039 | 50  | 0.02251 |
| <i>Peptostreptococcaceae</i> [11][G-2]_sp_oral_taxon_091 | 20.0 | 0.01038 | 30 | 0.00733 | 20  | 0.00513 |
| <i>Prevotella_fusca</i>                                  | 0.0  | 0.00000 | 10 | 0.00101 | 10  | 0.02179 |
| <i>Bacteroidetes</i> [G-5]_sp_oral_taxon_511             | 20.0 | 0.00428 | 0  | 0.00000 | 50  | 0.01720 |
| <i>Selenomonas_sp_oral_t</i>                             | 50.0 | 0.00921 | 40 | 0.00140 | 80  | 0.00922 |

**axon\_134**

|                                        |      |         |    |         |    |         |
|----------------------------------------|------|---------|----|---------|----|---------|
| <i>Anaeroglobus_geminatus</i>          | 50.0 | 0.01764 | 10 | 0.00026 | 60 | 0.00265 |
| <i>Tannerella_sp_oral_taxon_808</i>    | 40.0 | 0.01296 | 20 | 0.00657 | 30 | 0.00098 |
| <i>Prevotella_sp_oral_taxon_300</i>    | 60.0 | 0.00695 | 60 | 0.00437 | 80 | 0.00930 |
| <i>Centipeda_periodontii</i>           | 60.0 | 0.01011 | 40 | 0.00154 | 70 | 0.00513 |
| <i>Lactobacillus_Genus_probe_1</i>     | 0.0  | 0.00000 | 0  | 0.00000 | 80 | 0.02078 |
| <i>Actinobaculum_sp_oral_taxon_183</i> | 40.0 | 0.00615 | 50 | 0.00177 | 80 | 0.01132 |
| <i>Streptococcus_constellatus</i>      | 60.0 | 0.01183 | 20 | 0.00147 | 50 | 0.00439 |
| <i>Prevotella_sp_oral_taxon_317</i>    | 30.0 | 0.01074 | 30 | 0.00195 | 60 | 0.00615 |
| <i>Lachnoanaerobaculum_Genus_probe</i> | 50.0 | 0.01027 | 70 | 0.00526 | 70 | 0.00380 |
| <i>Selenomonas_artemidis</i>           | 30.0 | 0.01847 | 10 | 0.00013 | 20 | 0.00037 |
| <i>Scardovia_wiggisiae</i>             | 30.0 | 0.00292 | 30 | 0.00297 | 70 | 0.01269 |
| <i>Neisseria_flavescens</i>            | 10.0 | 0.00028 | 20 | 0.01797 | 10 | 0.00048 |
| SR1[G-1]_sp_oral_taxon_874             | 40.0 | 0.00276 | 30 | 0.00141 | 50 | 0.01451 |
| <i>Eubacterium[11][G-5]_saphenum</i>   | 50.0 | 0.01139 | 0  | 0.00000 | 20 | 0.00419 |
| <i>Porphyromonas_sp_oral_taxon_278</i> | 60.0 | 0.00422 | 60 | 0.00899 | 40 | 0.00458 |
| <i>Simonsiella_muelleri</i>            | 40.0 | 0.01107 | 0  | 0.00000 | 30 | 0.00541 |
| <i>Aggregatibacter_paraphrophilus</i>  | 10.0 | 0.00672 | 10 | 0.00447 | 10 | 0.00298 |
| <i>Leptotrichia_sp_oral_taxon_134</i>  | 40.0 | 0.01205 | 30 | 0.00249 | 50 | 0.00107 |

xon\_879

|                                              |      |         |    |         |     |         |
|----------------------------------------------|------|---------|----|---------|-----|---------|
| <i>Selenomonas_sputigena</i>                 | 40.0 | 0.00624 | 20 | 0.00136 | 100 | 0.00873 |
| <i>Cardiobacterium_Genus_probe</i>           | 60.0 | 0.00425 | 40 | 0.00203 | 70  | 0.00648 |
| TM7[G-1]_sp_oral_taxon_349                   | 40.0 | 0.00982 | 0  | 0.00000 | 50  | 0.00446 |
| <i>Bacteroidetes[G-5]_sp_oral_taxon_507</i>  | 0.0  | 0.00000 | 0  | 0.00000 | 0   | 0.00000 |
| <i>Selenomonas_Genus_probe_2</i>             | 80.0 | 0.00777 | 40 | 0.00204 | 70  | 0.00457 |
| <i>Fretibacterium_sp_oral_taxon_360</i>      | 50.0 | 0.00831 | 0  | 0.00000 | 10  | 0.00429 |
| <i>Porphyromonas_sp_oral_taxon_279</i>       | 30.0 | 0.00293 | 60 | 0.00516 | 40  | 0.00748 |
| <i>Kingella_sp_oral_taxon_459</i>            | 30.0 | 0.00271 | 50 | 0.00500 | 30  | 0.00316 |
| <i>Treponema_sp_oral_taxon_247</i>           | 10.0 | 0.00501 | 10 | 0.00029 | 10  | 0.00021 |
| <i>Capnocytophaga_Genus_probe_3</i>          | 50.0 | 0.00492 | 40 | 0.00085 | 70  | 0.00406 |
| <i>Selenomonas_sp_oral_taxon_146</i>         | 50.0 | 0.01050 | 30 | 0.00114 | 40  | 0.00326 |
| <i>Prevotella_sp_oral_taxon_292</i>          | 30.0 | 0.00351 | 10 | 0.00076 | 40  | 0.00262 |
| <i>Bacteroidetes[G-5]_Genus_probe</i>        | 40.0 | 0.00362 | 20 | 0.00044 | 40  | 0.00599 |
| <i>Prevotella_micans</i>                     | 50.0 | 0.01151 | 10 | 0.00039 | 30  | 0.00290 |
| <i>Capnocytophaga_sp_oral_taxon_338</i>      | 60.0 | 0.00266 | 40 | 0.00171 | 50  | 0.00935 |
| <i>Aggregatibacter_actinomycetemcomitans</i> | 40.0 | 0.01073 | 20 | 0.00129 | 0   | 0.00000 |

|                                                          |      |         |    |         |    |         |
|----------------------------------------------------------|------|---------|----|---------|----|---------|
| <i>Treponema lecithinolyticum</i>                        | 60.0 | 0.00514 | 20 | 0.00027 | 50 | 0.00908 |
| <i>Prevotella saccharolytica</i>                         | 20.0 | 0.00647 | 30 | 0.00120 | 50 | 0.00351 |
| <i>Treponema</i> _sp_oral_taxon_508                      | 20.0 | 0.00147 | 0  | 0.00000 | 10 | 0.00149 |
| <i>Peptostreptococcaceae</i> [11][G-7]_sp_oral_taxon_081 | 50.0 | 0.00514 | 30 | 0.00071 | 30 | 0.00505 |
| <i>Prevotella</i> _sp_oral_taxon_304                     | 20.0 | 0.01427 | 0  | 0.00000 | 10 | 0.00010 |
| <i>Eubacterium</i> [11][G-1]_infirmum                    | 40.0 | 0.00224 | 20 | 0.00042 | 60 | 0.00988 |
| <i>Prevotella intermedia</i>                             | 10.0 | 0.01377 | 0  | 0.00000 | 10 | 0.00050 |
| <i>Leptotrichia</i> _sp_oral_taxon_463                   | 30.0 | 0.00765 | 10 | 0.00014 | 10 | 0.00089 |
| <i>Fretibacterium</i> _Genus_probe_3                     | 40.0 | 0.00536 | 0  | 0.00000 | 30 | 0.00332 |
| SR1_Genus_probe                                          | 40.0 | 0.00477 | 30 | 0.00567 | 50 | 0.00263 |
| <i>Prevotella saccharolytica</i>                         | 30.0 | 0.01054 | 10 | 0.00039 | 60 | 0.00259 |
| TM7[G-1]_sp_oral_taxon_348                               | 40.0 | 0.00915 | 20 | 0.00040 | 50 | 0.00404 |
| <i>Porphyromonas</i> _sp_oral_taxon_275                  | 30.0 | 0.01155 | 20 | 0.00104 | 20 | 0.00088 |
| <i>Lachnospiraceae</i> [G-3]_sp_oral_taxon_100           | 50.0 | 0.00955 | 10 | 0.00358 | 20 | 0.00046 |
| <i>Clostridiales</i> [F-1][G-1]_sp_oral_taxon_093        | 50.0 | 0.00701 | 0  | 0.00000 | 20 | 0.00614 |
| <i>Prevotella</i> _sp_oral_taxon_443                     | 70.0 | 0.00821 | 20 | 0.00091 | 20 | 0.00031 |
| <i>Prevotella oralis</i>                                 | 40.0 | 0.00247 | 0  | 0.00000 | 40 | 0.00455 |

|                                              |      |         |    |         |    |         |
|----------------------------------------------|------|---------|----|---------|----|---------|
| <i>Bergeyella_sp_oral_taxon_907</i>          | 50.0 | 0.00687 | 30 | 0.00108 | 50 | 0.00499 |
| <i>Shuttleworthia_satelles</i>               | 20.0 | 0.00356 | 10 | 0.00008 | 70 | 0.00475 |
| <i>Streptococcus_cristatus</i>               | 80.0 | 0.00585 | 70 | 0.00359 | 20 | 0.00024 |
| <i>Treponema_socranskii</i>                  | 40.0 | 0.01071 | 10 | 0.00013 | 30 | 0.00147 |
| <i>Treponema_socranskii</i>                  | 10.0 | 0.00371 | 10 | 0.00014 | 50 | 0.00840 |
| <i>Neisseria_meningitidis</i>                | 60.0 | 0.00339 | 60 | 0.00187 | 60 | 0.00393 |
| <i>Lactobacillus_salivarius</i>              | 10.0 | 0.00318 | 0  | 0.00000 | 40 | 0.00883 |
| <i>Bacteroidaceae[G-1]_sp_oral_taxon_272</i> | 50.0 | 0.00767 | 10 | 0.00027 | 20 | 0.00043 |
| <i>Selenomonas_sputigena</i>                 | 30.0 | 0.00296 | 20 | 0.00097 | 40 | 0.00531 |
| <i>Dialister_micraerophilus</i>              | 30.0 | 0.00977 | 0  | 0.00000 | 30 | 0.00151 |
| <i>Prevotella_sp_oral_taxon_315</i>          | 70.0 | 0.00629 | 50 | 0.00231 | 60 | 0.00279 |
| <i>Actinomyces_odontolyticus</i>             | 0.0  | 0.00000 | 20 | 0.00324 | 30 | 0.00075 |
| <i>Bacteroidetes[G-5]_sp_oral_taxon_505</i>  | 10.0 | 0.00304 | 10 | 0.00026 | 10 | 0.00743 |
| <i>Treponema_sp_oral_taxon_256</i>           | 10.0 | 0.00063 | 10 | 0.00014 | 10 | 0.00716 |
| <i>Alloprevotella_sp_oral_taxon_914</i>      | 10.0 | 0.00057 | 10 | 0.00537 | 40 | 0.00092 |
| <i>Prevotella_sp_oral_taxon_301</i>          | 30.0 | 0.00617 | 10 | 0.00026 | 50 | 0.00215 |
| <i>Prevotella_micans</i>                     | 20.0 | 0.00605 | 10 | 0.00060 | 20 | 0.00369 |
| <i>Bacteroidetes[G-3]_Genus_probe</i>        | 10.0 | 0.00202 | 0  | 0.00000 | 30 | 0.00639 |
| <i>Selenomonas_sputigena</i>                 | 30.0 | 0.00418 | 40 | 0.00200 | 60 | 0.00289 |

|                                               |      |         |    |         |    |         |
|-----------------------------------------------|------|---------|----|---------|----|---------|
| <i>Bulleidia_extracta</i>                     | 20.0 | 0.00090 | 20 | 0.00093 | 30 | 0.00898 |
| <i>Treponema_sp_oral_taxon_238</i>            | 10.0 | 0.00125 | 0  | 0.00000 | 10 | 0.00611 |
| <i>Atopobium_rimae</i>                        | 50.0 | 0.00278 | 70 | 0.00255 | 70 | 0.00404 |
| <i>Neisseria_subflava</i>                     | 0.0  | 0.00000 | 20 | 0.00616 | 0  | 0.00000 |
| <i>Tannerella_Genus_prob_e</i>                | 50.0 | 0.00706 | 20 | 0.00132 | 60 | 0.00188 |
| <i>Mycoplasma_orale</i>                       | 40.0 | 0.00621 | 10 | 0.00202 | 10 | 0.00209 |
| <i>Selenomonas_dianae</i>                     | 40.0 | 0.00562 | 10 | 0.00013 | 50 | 0.00090 |
| <i>Actinomyces_naeslundii</i>                 | 40.0 | 0.00210 | 40 | 0.00194 | 90 | 0.00473 |
| <i>Bacteroidetes[G-3]_sp_oral_taxon_280</i>   | 30.0 | 0.00773 | 0  | 0.00000 | 20 | 0.00106 |
| <i>Veillonellaceae[G-1]_sp_oral_taxon_155</i> | 30.0 | 0.00394 | 20 | 0.00061 | 70 | 0.00325 |
| <i>Bergeyella_sp_oral_taxon_900</i>           | 30.0 | 0.00212 | 30 | 0.00280 | 50 | 0.00463 |
| <i>Streptococcus_sp_oral_taxon_068</i>        | 40.0 | 0.00225 | 60 | 0.00323 | 90 | 0.00328 |
| <i>Actinomyces_sp_oral_taxon_448</i>          | 0.0  | 0.00000 | 10 | 0.00076 | 80 | 0.00688 |
| <i>Selenomonas_Genus_prob_e_1</i>             | 40.0 | 0.00653 | 10 | 0.00101 | 50 | 0.00188 |
| <i>Selenomonas_dianae</i>                     | 40.0 | 0.00370 | 40 | 0.00066 | 70 | 0.00391 |
| <i>Capnocytophaga_sp_oral_taxon_332</i>       | 40.0 | 0.00600 | 10 | 0.00060 | 20 | 0.00064 |
| <i>Mitsuokella_sp_oral_taxon_521</i>          | 0.0  | 0.00000 | 10 | 0.00103 | 20 | 0.00278 |
| <i>Selenomonas_artemidis</i>                  | 40.0 | 0.00615 | 10 | 0.00063 | 40 | 0.00192 |
| TM7[G-2]_sp_oral_taxon_350                    | 50.0 | 0.00629 | 0  | 0.00000 | 30 | 0.00191 |

|                                                  |      |         |    |         |    |         |
|--------------------------------------------------|------|---------|----|---------|----|---------|
| <i>Porphyromonas_catoniae</i>                    | 20.0 | 0.00492 | 20 | 0.00226 | 10 | 0.00092 |
| <i>Neisseria_bacilliformis</i>                   | 50.0 | 0.00619 | 10 | 0.00008 | 10 | 0.00092 |
| TM7[G-1]_sp_oral_taxon_347                       | 30.0 | 0.00182 | 10 | 0.00063 | 70 | 0.00563 |
| <i>Dialister_sp_oral_taxon_502</i>               | 0.0  | 0.00000 | 30 | 0.00070 | 50 | 0.00727 |
| <i>Treponema_sp_oral_taxon_254</i>               | 30.0 | 0.00406 | 0  | 0.00000 | 10 | 0.00033 |
| <i>Selenomonas_sp_oral_taxon_134</i>             | 40.0 | 0.00409 | 30 | 0.00089 | 40 | 0.00079 |
| <i>Parvimonas_sp_oral_taxon_110</i>              | 20.0 | 0.00098 | 30 | 0.00256 | 30 | 0.00412 |
| <i>Lactobacillus_Genus_probe_3</i>               | 0.0  | 0.00000 | 50 | 0.00174 | 80 | 0.00561 |
| <i>Fusobacterium_nucleatum_subsp_vincentii</i>   | 70.0 | 0.00526 | 30 | 0.00070 | 40 | 0.00155 |
| Peptostreptococcaceae[11][G-4]_sp_oral_taxon_369 | 50.0 | 0.00410 | 10 | 0.00013 | 20 | 0.00228 |
| <i>Lactococcus_lactis</i>                        | 10.0 | 0.00172 | 10 | 0.00039 | 20 | 0.00525 |
| <i>Mogibacterium_timidum</i>                     | 40.0 | 0.00442 | 10 | 0.00022 | 20 | 0.00181 |
| <i>Alloscardovia_omnicolens</i>                  | 30.0 | 0.00545 | 0  | 0.00000 | 30 | 0.00162 |
| <i>Prevotella_loescheii</i>                      | 10.0 | 0.00028 | 10 | 0.00089 | 10 | 0.00479 |
| <i>Johnsonella_sp_oral_taxon_166</i>             | 50.0 | 0.00324 | 0  | 0.00000 | 0  | 0.00000 |
| <i>Fusobacterium_nucleatum_subsp_animalis</i>    | 50.0 | 0.00373 | 30 | 0.00145 | 60 | 0.00139 |
| <i>Eubacterium</i> [11][G-6]_nodatum             | 40.0 | 0.00652 | 0  | 0.00000 | 10 | 0.00014 |



|                                                  |      |         |    |         |    |         |
|--------------------------------------------------|------|---------|----|---------|----|---------|
| <i>Desulfomicrobium_orale</i>                    | 20.0 | 0.00369 | 0  | 0.00000 | 0  | 0.00000 |
| <i>Catonella_sp_oral_taxon_451</i>               | 20.0 | 0.00195 | 0  | 0.00000 | 20 | 0.00261 |
| <i>Bacteroidetes[G-3]_sp_oral_taxon_503</i>      | 20.0 | 0.00211 | 10 | 0.00221 | 20 | 0.00192 |
| <i>Prevotella_loescheii</i>                      | 20.0 | 0.00163 | 0  | 0.00000 | 20 | 0.00393 |
| TM7[G-1]_sp_oral_taxon_348                       | 20.0 | 0.00514 | 10 | 0.00043 | 10 | 0.00053 |
| <i>Fusobacterium_nucleatum_subsp_polymorphum</i> | 40.0 | 0.00379 | 30 | 0.00072 | 20 | 0.00031 |
| <i>Lachnospiraceae[G-5]_sp_oral_taxon_080</i>    | 20.0 | 0.00124 | 0  | 0.00000 | 10 | 0.00264 |
| <i>Tannerella_sp_oral_taxon_916</i>              | 30.0 | 0.00259 | 30 | 0.00099 | 40 | 0.00198 |
| <i>Mycoplasma_salivarium</i>                     | 40.0 | 0.00208 | 10 | 0.00038 | 50 | 0.00275 |
| <i>Lactobacillus_Genus_probe_5</i>               | 0.0  | 0.00000 | 0  | 0.00000 | 20 | 0.00545 |
| <i>Johnsonella_ignava</i>                        | 50.0 | 0.00186 | 20 | 0.00094 | 20 | 0.00195 |
| <i>Prevotella_buccae</i>                         | 20.0 | 0.00196 | 30 | 0.00078 | 40 | 0.00265 |
| <i>Capnocytophaga_sp_oral_taxon_336</i>          | 40.0 | 0.00217 | 20 | 0.00042 | 30 | 0.00084 |
| <i>Megasphaera_sp_oral_taxon_123</i>             | 0.0  | 0.00000 | 10 | 0.00025 | 30 | 0.00487 |
| <i>Mitsuokella_sp_oral_taxon_521</i>             | 20.0 | 0.00114 | 30 | 0.00244 | 30 | 0.00075 |
| <i>Capnocytophaga_sp_oral_taxon_864</i>          | 20.0 | 0.00276 | 30 | 0.00093 | 20 | 0.00106 |
| <i>Selenomonas_flueggei</i>                      | 30.0 | 0.00178 | 10 | 0.00114 | 50 | 0.00207 |

|                                                     |      |         |    |         |    |         |
|-----------------------------------------------------|------|---------|----|---------|----|---------|
| <i>Erysipelothrichaceae</i> [G-1]_sp_oral_taxon_905 | 10.0 | 0.00067 | 10 | 0.00013 | 30 | 0.00418 |
| <i>Dialister</i> _Genus_probe_2                     | 30.0 | 0.00090 | 10 | 0.00038 | 50 | 0.00259 |
| <i>Neisseria</i> _sp_oral_taxon_499                 | 20.0 | 0.00144 | 20 | 0.00030 | 30 | 0.00309 |
| <i>Neisseria_sicca</i>                              | 60.0 | 0.00176 | 20 | 0.00117 | 40 | 0.00099 |
| <i>Alloprevotella</i> _sp_oral_taxon_912            | 20.0 | 0.00166 | 30 | 0.00177 | 20 | 0.00048 |
| <i>Fusobacterium_nucleatum</i> _subsp_animalis      | 60.0 | 0.00341 | 10 | 0.00039 | 40 | 0.00091 |
| <i>Porphyromonas_catoniae</i>                       | 0.0  | 0.00000 | 0  | 0.00000 | 20 | 0.00454 |
| <i>Capnocytophaga_haemolytica</i>                   | 10.0 | 0.00034 | 60 | 0.00355 | 30 | 0.00060 |
| <i>Parascardovia_denticolens</i>                    | 10.0 | 0.00035 | 0  | 0.00000 | 40 | 0.00411 |
| <i>Treponema</i> _sp_oral_taxon_239                 | 0.0  | 0.00000 | 0  | 0.00000 | 0  | 0.00000 |
| <i>Treponema</i> _sp_oral_taxon_258                 | 30.0 | 0.00116 | 0  | 0.00000 | 20 | 0.00323 |
| <i>Capnocytophaga</i> _sp_oral_taxon_902            | 30.0 | 0.00301 | 0  | 0.00000 | 20 | 0.00037 |
| <i>Prevotella_fusca</i>                             | 10.0 | 0.00438 | 0  | 0.00000 | 0  | 0.00000 |
| <i>Lactobacillus_vaginalis</i>                      | 0.0  | 0.00000 | 0  | 0.00000 | 60 | 0.00437 |
| <i>Filifactor</i> _Genus_probe                      | 50.0 | 0.00425 | 0  | 0.00000 | 0  | 0.00000 |
| <i>Lachnospiraceae</i> [G-3]_sp_oral_taxon_100      | 20.0 | 0.00349 | 10 | 0.00060 | 10 | 0.00014 |
| <i>Selenomonas</i> _sp_oral_taxon_137               | 40.0 | 0.00196 | 20 | 0.00087 | 30 | 0.00132 |
| <i>Streptococcus</i> _Genus_p                       | 10.0 | 0.00057 | 30 | 0.00079 | 40 | 0.00279 |

robe\_2

|                                                                  |      |         |    |         |    |         |
|------------------------------------------------------------------|------|---------|----|---------|----|---------|
| <i>Lachnoanaerobaculum_</i><br><i>sp_oral_taxon_083</i>          | 10.0 | 0.00094 | 10 | 0.00209 | 10 | 0.00014 |
| <i>Prevotella_marshii</i>                                        | 10.0 | 0.00236 | 10 | 0.00030 | 10 | 0.00139 |
| <i>Treponema_Genus_pro</i><br><i>be_5</i>                        | 30.0 | 0.00147 | 0  | 0.00000 | 10 | 0.00165 |
| <i>Peptostreptococcaceae</i> [<br>13][G-<br>1]_sp_oral_taxon_113 | 30.0 | 0.00339 | 0  | 0.00000 | 10 | 0.00044 |
| <i>Prevotella_sp_oral_tax</i><br><i>on_306</i>                   | 40.0 | 0.00161 | 30 | 0.00087 | 40 | 0.00114 |
| <i>Actinomyces_massiliens</i><br><i>is</i>                       | 30.0 | 0.00106 | 40 | 0.00100 | 70 | 0.00155 |
| <i>Peptostreptococcaceae</i> [<br>11][G-<br>2]_sp_oral_taxon_091 | 20.0 | 0.00163 | 0  | 0.00000 | 20 | 0.00201 |
| <i>Gemella_bergeri</i>                                           | 0.0  | 0.00000 | 10 | 0.00058 | 40 | 0.00280 |
| <i>Eubacterium</i> [11][G-<br>7]_yurii                           | 30.0 | 0.00212 | 0  | 0.00000 | 10 | 0.00149 |
| <i>Bifidobacterium_dentiu</i><br><i>m</i>                        | 20.0 | 0.00070 | 10 | 0.00026 | 50 | 0.00263 |
| <i>Bifidobacterium_longu</i><br><i>m</i>                         | 10.0 | 0.00028 | 10 | 0.00039 | 20 | 0.00104 |
| <i>Actinomyces_meyeri</i>                                        | 0.0  | 0.00000 | 30 | 0.00059 | 30 | 0.00274 |
| <i>Mitsuokella_sp_oral_ta</i><br><i>xon_131</i>                  | 10.0 | 0.00071 | 0  | 0.00000 | 40 | 0.00243 |
| <i>Treponema_maltophilu</i><br><i>m</i>                          | 20.0 | 0.00223 | 10 | 0.00025 | 20 | 0.00079 |
| <i>Actinomyces_sp_oral_t</i><br><i>axon_170</i>                  | 20.0 | 0.00090 | 10 | 0.00038 | 20 | 0.00072 |
| <i>Treponema_sp_oral_ta</i><br><i>xon_263</i>                    | 10.0 | 0.00028 | 0  | 0.00000 | 10 | 0.00297 |

|                                             |      |         |    |         |    |         |
|---------------------------------------------|------|---------|----|---------|----|---------|
| <i>Prevotella_marshii</i>                   | 0.0  | 0.00000 | 30 | 0.00099 | 20 | 0.00226 |
| <i>Ottowia_sp_oral_taxon_894</i>            | 30.0 | 0.00303 | 0  | 0.00000 | 10 | 0.00017 |
| <i>Bacteroidetes[G-3]_sp_oral_taxon_365</i> | 10.0 | 0.00057 | 0  | 0.00000 | 10 | 0.00165 |
| <i>Dialister_sp_oral_taxon_502</i>          | 20.0 | 0.00152 | 10 | 0.00029 | 10 | 0.00128 |
| <i>Capnocytophaga_sp_oral_taxon_335</i>     | 20.0 | 0.00204 | 0  | 0.00000 | 10 | 0.00014 |
| <i>Lactobacillus_fermentum</i>              | 0.0  | 0.00000 | 0  | 0.00000 | 40 | 0.00303 |
| <i>Fusobacterium_sp_oral_taxon_205</i>      | 30.0 | 0.00137 | 0  | 0.00000 | 30 | 0.00059 |
| <i>Mycoplasma_Genus_probe</i>               | 20.0 | 0.00148 | 10 | 0.00014 | 30 | 0.00044 |
| <i>Cryptobacterium_curtum</i>               | 30.0 | 0.00134 | 0  | 0.00000 | 50 | 0.00161 |
| <i>Atopobium_sp_oral_taxon_416</i>          | 0.0  | 0.00000 | 0  | 0.00000 | 10 | 0.00019 |
| <i>Selenomonas_sp_oral_taxon_138</i>        | 10.0 | 0.00035 | 30 | 0.00087 | 60 | 0.00128 |
| <i>Neisseria_sp_oral_taxon_018</i>          | 10.0 | 0.00275 | 0  | 0.00000 | 0  | 0.00000 |
| <i>Capnocytophaga_ochracea</i>              | 0.0  | 0.00000 | 20 | 0.00036 | 30 | 0.00234 |
| <i>Olsenella_sp_oral_taxon_807</i>          | 30.0 | 0.00177 | 0  | 0.00000 | 20 | 0.00080 |
| <i>Tannerella_sp_oral_taxon_916</i>         | 20.0 | 0.00108 | 20 | 0.00077 | 20 | 0.00080 |
| <i>Campylobacter_curvus</i>                 | 30.0 | 0.00261 | 0  | 0.00000 | 0  | 0.00000 |
| <i>Actinomyces_sp_oral_taxon_178</i>        | 30.0 | 0.00099 | 10 | 0.00017 | 40 | 0.00145 |

|                                                |      |         |    |         |    |         |
|------------------------------------------------|------|---------|----|---------|----|---------|
| <i>Fusobacterium_necrophorum</i>               | 10.0 | 0.00057 | 0  | 0.00000 | 10 | 0.00056 |
| <i>Actinomyces_israelii</i>                    | 10.0 | 0.00067 | 0  | 0.00000 | 30 | 0.00084 |
| <i>Actinomyces_sp_oral_taxon_171</i>           | 30.0 | 0.00101 | 10 | 0.00038 | 40 | 0.00100 |
| <i>Ottowia_sp_oral_taxon_894</i>               | 0.0  | 0.00000 | 0  | 0.00000 | 10 | 0.00237 |
| <i>Actinomyces_gerencseriae</i>                | 10.0 | 0.00057 | 0  | 0.00000 | 30 | 0.00090 |
| <i>Eubacterium</i> [11][G-6]_nodatum           | 10.0 | 0.00034 | 0  | 0.00000 | 10 | 0.00017 |
| <i>Prevotella_sp_oral_taxon_475</i>            | 10.0 | 0.00067 | 30 | 0.00082 | 30 | 0.00057 |
| <i>Dialister_Genus_probe_1</i>                 | 10.0 | 0.00067 | 0  | 0.00000 | 30 | 0.00050 |
| <i>Prevotella_sp_oral_taxon_376</i>            | 40.0 | 0.00149 | 0  | 0.00000 | 10 | 0.00069 |
| <i>Porphyromonas_sp_oral_taxon_277</i>         | 0.0  | 0.00000 | 20 | 0.00213 | 0  | 0.00000 |
| <i>Treponema_vincentii</i>                     | 10.0 | 0.00101 | 0  | 0.00000 | 20 | 0.00110 |
| <i>Staphylococcus_Genus_probe_3</i>            | 0.0  | 0.00000 | 0  | 0.00000 | 50 | 0.00117 |
| <i>Treponema_sp_oral_taxon_268</i>             | 30.0 | 0.00179 | 10 | 0.00025 | 0  | 0.00000 |
| <i>Campylobacter_Genus_probe_1</i>             | 30.0 | 0.00107 | 0  | 0.00000 | 30 | 0.00092 |
| <i>Slackia_exigua</i>                          | 30.0 | 0.00119 | 10 | 0.00013 | 10 | 0.00066 |
| <i>Lachnospiraceae</i> [G-7]_sp_oral_taxon_163 | 20.0 | 0.00176 | 0  | 0.00000 | 10 | 0.00021 |
| <i>Capnocytophaga_sp_oral_taxon_903</i>        | 0.0  | 0.00000 | 20 | 0.00051 | 10 | 0.00055 |

|                                                 |      |         |    |         |    |         |
|-------------------------------------------------|------|---------|----|---------|----|---------|
| <i>Capnocytophaga</i> _sp_oral_taxon_863        | 10.0 | 0.00070 | 0  | 0.00000 | 10 | 0.00030 |
| <i>Prevotella_enoeca</i>                        | 10.0 | 0.00028 | 30 | 0.00082 | 20 | 0.00077 |
| <i>Porphyromonas</i> _sp_oral_taxon_284         | 20.0 | 0.00119 | 0  | 0.00000 | 20 | 0.00067 |
| GN02[G-1]_sp_oral_taxon_872                     | 30.0 | 0.00128 | 10 | 0.00013 | 20 | 0.00045 |
| <i>Veillonellaceae</i> _Genus_probe_3           | 20.0 | 0.00130 | 0  | 0.00000 | 30 | 0.00052 |
| GN02[G-1]_sp_oral_taxon_871                     | 10.0 | 0.00028 | 10 | 0.00051 | 10 | 0.00014 |
| <i>Leptotrichiaceae</i> [G-1]_sp_oral_taxon_220 | 20.0 | 0.00090 | 0  | 0.00000 | 0  | 0.00000 |
| <i>Peptococcus</i> _sp_oral_taxon_167           | 10.0 | 0.00028 | 0  | 0.00000 | 10 | 0.00149 |
| <i>Capnocytophaga</i> _sp_oral_taxon_878        | 0.0  | 0.00000 | 0  | 0.00000 | 0  | 0.00000 |
| <i>Fretibacterium</i> _Genus_probe_2            | 10.0 | 0.00057 | 0  | 0.00000 | 10 | 0.00116 |
| <i>Actinomyces_naeslundii</i>                   | 10.0 | 0.00028 | 0  | 0.00000 | 30 | 0.00053 |
| <i>Olsenella</i> _sp_oral_taxon_809             | 20.0 | 0.00064 | 20 | 0.00090 | 0  | 0.00000 |
| <i>Lachnospiraceae</i> [G-7]_sp_oral_taxon_086  | 10.0 | 0.00035 | 0  | 0.00000 | 30 | 0.00040 |
| <i>Porphyromonas</i> _sp_oral_taxon_275         | 0.0  | 0.00000 | 10 | 0.00149 | 10 | 0.00013 |
| <i>Selenomonas_sputigena</i>                    | 20.0 | 0.00104 | 0  | 0.00000 | 30 | 0.00057 |
| <i>Desulfobulbus</i> _sp_oral_taxon_041         | 20.0 | 0.00120 | 0  | 0.00000 | 0  | 0.00000 |
| <i>Bacteroidetes</i> [G-5]_sp_oral_taxon_511    | 30.0 | 0.00156 | 0  | 0.00000 | 0  | 0.00000 |

|                                                          |      |         |    |         |    |         |
|----------------------------------------------------------|------|---------|----|---------|----|---------|
| <i>Bacteroidetes</i> [G-6]_sp_oral_taxon_516             | 10.0 | 0.00067 | 0  | 0.00000 | 0  | 0.00000 |
| <i>Treponema_socranskii</i>                              | 20.0 | 0.00108 | 0  | 0.00000 | 20 | 0.00047 |
| <i>Fusobacterium</i> _Genus_probe_1                      | 20.0 | 0.00063 | 30 | 0.00081 | 10 | 0.00010 |
| <i>Desulfobulbus</i> _Genus_probe                        | 0.0  | 0.00000 | 0  | 0.00000 | 10 | 0.00149 |
| <i>Prevotella</i> _sp_oral_taxon_317                     | 10.0 | 0.00035 | 0  | 0.00000 | 20 | 0.00107 |
| <i>Actinomyces</i> _sp_oral_taxon_848                    | 10.0 | 0.00061 | 0  | 0.00000 | 50 | 0.00081 |
| <i>Selenomonas</i> _sp_oral_taxon_478                    | 40.0 | 0.00139 | 0  | 0.00000 | 0  | 0.00000 |
| <i>Prevotella_enoeca</i>                                 | 20.0 | 0.00114 | 0  | 0.00000 | 10 | 0.00019 |
| <i>Lachnospiraceae</i> [G-2]_sp_oral_taxon_088           | 0.0  | 0.00000 | 20 | 0.00056 | 20 | 0.00063 |
| <i>Selenomonas</i> _sp_oral_taxon_133                    | 10.0 | 0.00106 | 10 | 0.00026 | 0  | 0.00000 |
| <i>Leptotrichia</i> _sp_oral_taxon_223                   | 20.0 | 0.00129 | 0  | 0.00000 | 0  | 0.00000 |
| <i>Kingella</i> _Genus_probe_2                           | 10.0 | 0.00034 | 20 | 0.00094 | 0  | 0.00000 |
| <i>Lactobacillus</i> _Genus_probe_2                      | 0.0  | 0.00000 | 0  | 0.00000 | 30 | 0.00124 |
| <i>Aggregatibacter</i> _sp_oral_taxon_512                | 10.0 | 0.00034 | 10 | 0.00063 | 10 | 0.00027 |
| <i>Capnocytophaga</i> _Genus_probe_1                     | 10.0 | 0.00034 | 0  | 0.00000 | 0  | 0.00000 |
| <i>Peptostreptococcaceae</i> [11][G-2]_sp_oral_taxon_091 | 10.0 | 0.00034 | 0  | 0.00000 | 0  | 0.00000 |
| <i>Tannerella</i> _sp_oral_taxon                         | 30.0 | 0.00122 | 0  | 0.00000 | 0  | 0.00000 |

on\_916

|                                                  |      |         |    |         |    |         |
|--------------------------------------------------|------|---------|----|---------|----|---------|
| <i>Proteus_Genus_probe</i>                       | 10.0 | 0.00092 | 0  | 0.00000 | 20 | 0.00028 |
| <i>Treponema_parvum</i>                          | 20.0 | 0.00099 | 0  | 0.00000 | 10 | 0.00017 |
| <i>Treponema_sp_oral_taxon_234</i>               | 20.0 | 0.00057 | 0  | 0.00000 | 20 | 0.00056 |
| <i>Sneathia_amnionii</i>                         | 0.0  | 0.00000 | 0  | 0.00000 | 10 | 0.00050 |
| <i>Porphyromonas_uenonis</i>                     | 0.0  | 0.00000 | 10 | 0.00110 | 0  | 0.00000 |
| <i>Clostridiales[F-2][G-3]_sp_oral_taxon_381</i> | 0.0  | 0.00000 | 40 | 0.00074 | 10 | 0.00033 |
| <i>Actinomyces_johnsonii</i>                     | 0.0  | 0.00000 | 0  | 0.00000 | 30 | 0.00105 |
| <i>Lactobacillus_Genus_probe_4</i>               | 0.0  | 0.00000 | 10 | 0.00014 | 10 | 0.00069 |
| <i>Prevotella_sp_oral_taxon_300</i>              | 0.0  | 0.00000 | 10 | 0.00022 | 10 | 0.00059 |
| <i>Peptoniphilus_sp_oral_taxon_386</i>           | 10.0 | 0.00094 | 0  | 0.00000 | 0  | 0.00000 |
| <i>Veillonellaceae[G-1]_sp_oral_taxon_145</i>    | 30.0 | 0.00093 | 0  | 0.00000 | 0  | 0.00000 |
| <i>Dialister_sp_oral_taxon_119</i>               | 10.0 | 0.00057 | 10 | 0.00025 | 10 | 0.00010 |
| <i>Selenomonas_sputigena</i>                     | 0.0  | 0.00000 | 10 | 0.00026 | 10 | 0.00066 |
| <i>Treponema_sp_oral_taxon_249</i>               | 0.0  | 0.00000 | 0  | 0.00000 | 0  | 0.00000 |
| <i>Proteus_mirabilis</i>                         | 10.0 | 0.00061 | 0  | 0.00000 | 20 | 0.00026 |
| <i>Prevotella_sp_oral_taxon_296</i>              | 0.0  | 0.00000 | 20 | 0.00086 | 0  | 0.00000 |
| <i>Actinomyces_sp_oral_taxon_175</i>             | 0.0  | 0.00000 | 10 | 0.00025 | 30 | 0.00057 |
| <i>Atopobium_sp_oral_taxon_175</i>               | 10.0 | 0.00035 | 0  | 0.00000 | 20 | 0.00033 |



on\_199

|                                                          |      |         |    |         |    |         |
|----------------------------------------------------------|------|---------|----|---------|----|---------|
| <i>Lactobacillus_iners</i>                               | 0.0  | 0.00000 | 10 | 0.00078 | 0  | 0.00000 |
| <i>Treponema_sp_oral_taxon_255</i>                       | 10.0 | 0.00031 | 0  | 0.00000 | 20 | 0.00044 |
| <i>Selenomonas_sp_oral_taxon_137</i>                     | 10.0 | 0.00028 | 0  | 0.00000 | 10 | 0.00046 |
| <i>Sneathia_sanguinegens</i>                             | 0.0  | 0.00000 | 10 | 0.00074 | 0  | 0.00000 |
| <i>Capnocytophaga_sp_oral_taxon_323</i>                  | 0.0  | 0.00000 | 10 | 0.00060 | 10 | 0.00014 |
| <i>Porphyromonas_sp_oral_taxon_277</i>                   | 10.0 | 0.00028 | 10 | 0.00031 | 10 | 0.00014 |
| <i>Oribacterium_sp_oral_taxon_102</i>                    | 10.0 | 0.00028 | 10 | 0.00008 | 10 | 0.00033 |
| <i>Peptostreptococcaceae</i> [11][G-3]_sp_oral_taxon_382 | 10.0 | 0.00067 | 0  | 0.00000 | 0  | 0.00000 |
| <i>Selenomonas_sp_oral_taxon_442</i>                     | 10.0 | 0.00067 | 0  | 0.00000 | 0  | 0.00000 |
| <i>Stomatobaculum_sp_oral_taxon_373</i>                  | 10.0 | 0.00067 | 0  | 0.00000 | 0  | 0.00000 |
| <i>Syntrophomonadaceae</i> [8][G-1]_sp_oral_taxon_435    | 10.0 | 0.00067 | 0  | 0.00000 | 0  | 0.00000 |
| <i>Treponema_pectinovorum</i>                            | 10.0 | 0.00067 | 0  | 0.00000 | 0  | 0.00000 |
| <i>Megasphaera_sp_oral_taxon_123</i>                     | 10.0 | 0.00057 | 0  | 0.00000 | 10 | 0.00010 |
| <i>Acinetobacter_Genus_probe</i>                         | 10.0 | 0.00028 | 10 | 0.00038 | 0  | 0.00000 |
| <i>Fusobacterium_gonidiaformans</i>                      | 0.0  | 0.00000 | 0  | 0.00000 | 10 | 0.00066 |
| <i>Selenomonas_sp_oral_taxon_199</i>                     | 20.0 | 0.00063 | 0  | 0.00000 | 0  | 0.00000 |

axon\_136

|                                                |      |         |    |         |    |         |
|------------------------------------------------|------|---------|----|---------|----|---------|
| <i>Prevotella</i> _sp_oral_taxon_820           | 0.0  | 0.00000 | 10 | 0.00063 | 0  | 0.00000 |
| <i>Veillonellaceae</i> [G-1]_sp_oral_taxon_135 | 0.0  | 0.00000 | 10 | 0.00030 | 10 | 0.00033 |
| <i>Eggerthia_catenaformis</i>                  | 0.0  | 0.00000 | 0  | 0.00000 | 20 | 0.00063 |
| <i>Mollicutes</i> [G-1]_sp_oral_taxon_504      | 10.0 | 0.00063 | 0  | 0.00000 | 0  | 0.00000 |
| <i>Treponema</i> _sp_oral_taxon_226            | 10.0 | 0.00031 | 0  | 0.00000 | 20 | 0.00030 |
| <i>Streptococcus</i> _sp_oral_taxon_487        | 0.0  | 0.00000 | 10 | 0.00026 | 30 | 0.00035 |
| GN02[G-2]_sp_oral_taxon_873                    | 20.0 | 0.00060 | 0  | 0.00000 | 0  | 0.00000 |
| <i>Veillonellaceae</i> [G-1]_sp_oral_taxon_918 | 20.0 | 0.00060 | 0  | 0.00000 | 0  | 0.00000 |
| <i>Treponema</i> _sp_oral_taxon_518            | 20.0 | 0.00060 | 0  | 0.00000 | 0  | 0.00000 |
| <i>Veillonellaceae</i> _Genus_probe_2          | 0.0  | 0.00000 | 10 | 0.00030 | 10 | 0.00028 |
| <i>Johnsonella</i> _Genus_probe                | 10.0 | 0.00057 | 0  | 0.00000 | 0  | 0.00000 |
| <i>Peptoniphilus</i> _sp_oral_taxon_836        | 10.0 | 0.00057 | 0  | 0.00000 | 0  | 0.00000 |
| <i>Selenomonas</i> _sp_oral_taxon_388          | 10.0 | 0.00057 | 0  | 0.00000 | 0  | 0.00000 |
| <i>Scardovia</i> _Genus_probe                  | 0.0  | 0.00000 | 0  | 0.00000 | 30 | 0.00056 |
| <i>Chloroflexi</i> [G-1]_sp_oral_taxon_439     | 10.0 | 0.00034 | 0  | 0.00000 | 10 | 0.00017 |
| <i>Anaerococcus</i> _Genus_probe_2             | 10.0 | 0.00035 | 0  | 0.00000 | 10 | 0.00013 |

|                                                         |      |         |    |         |    |         |
|---------------------------------------------------------|------|---------|----|---------|----|---------|
| <i>Actinomyces_viscosus</i>                             | 0.0  | 0.00000 | 10 | 0.00008 | 10 | 0.00014 |
| <i>Treponema_sp_oral_taxon_235</i>                      | 10.0 | 0.00028 | 0  | 0.00000 | 10 | 0.00017 |
| <i>Treponema_sp_oral_taxon_236</i>                      | 10.0 | 0.00031 | 0  | 0.00000 | 10 | 0.00011 |
| <i>Arcanobacterium_haemolyticum</i>                     | 0.0  | 0.00000 | 10 | 0.00014 | 0  | 0.00000 |
| <i>Pseudomonas_Genus_probe</i>                          | 10.0 | 0.00035 | 0  | 0.00000 | 0  | 0.00000 |
| <i>Veillonellaceae[G-1]_sp_oral_taxon_483</i>           | 0.0  | 0.00000 | 0  | 0.00000 | 20 | 0.00035 |
| <i>Butyrivibrio_sp_oral_taxon_094</i>                   | 10.0 | 0.00034 | 0  | 0.00000 | 0  | 0.00000 |
| <i>Fretibacterium_sp_oral_taxon_361</i>                 | 10.0 | 0.00034 | 0  | 0.00000 | 0  | 0.00000 |
| <i>Peptostreptococcaceae[11][G-3]_sp_oral_taxon_495</i> | 10.0 | 0.00034 | 0  | 0.00000 | 0  | 0.00000 |
| <i>Prevotella_sp_oral_taxon_515</i>                     | 10.0 | 0.00034 | 0  | 0.00000 | 0  | 0.00000 |
| TM7[G-4]_sp_oral_taxon_355                              | 10.0 | 0.00034 | 0  | 0.00000 | 0  | 0.00000 |
| <i>Actinomyces_sp_oral_taxon_525</i>                    | 0.0  | 0.00000 | 0  | 0.00000 | 10 | 0.00033 |
| <i>Olsenella_uli</i>                                    | 0.0  | 0.00000 | 0  | 0.00000 | 10 | 0.00033 |
| <i>Capnocytophaga_sp_oral_taxon_412</i>                 | 10.0 | 0.00031 | 0  | 0.00000 | 0  | 0.00000 |
| <i>Porphyromonas_catoniae</i>                           | 10.0 | 0.00029 | 0  | 0.00000 | 0  | 0.00000 |
| <i>Treponema_Genus_probe_1</i>                          | 10.0 | 0.00028 | 0  | 0.00000 | 0  | 0.00000 |
| <i>Alloprevotella_sp_oral_</i>                          | 10.0 | 0.00028 | 0  | 0.00000 | 0  | 0.00000 |

taxon\_913

|                                                |      |         |    |         |    |         |
|------------------------------------------------|------|---------|----|---------|----|---------|
| <i>Eubacterium</i> [11][G-7]_yurii             | 10.0 | 0.00028 | 0  | 0.00000 | 0  | 0.00000 |
| <i>Olsenella</i> _Genus_probe                  | 10.0 | 0.00028 | 0  | 0.00000 | 0  | 0.00000 |
| <i>Treponema</i> _sp_oral_taxon_262            | 10.0 | 0.00028 | 0  | 0.00000 | 0  | 0.00000 |
| <i>Olsenella</i> _profusa                      | 0.0  | 0.00000 | 0  | 0.00000 | 10 | 0.00014 |
| <i>Leptotrichia</i> _sp_oral_taxon_215         | 0.0  | 0.00000 | 10 | 0.00026 | 0  | 0.00000 |
| <i>Selenomonas</i> _sp_oral_taxon_137          | 0.0  | 0.00000 | 10 | 0.00025 | 0  | 0.00000 |
| <i>Bifidobacterium</i> _Genus_probe_1          | 0.0  | 0.00000 | 0  | 0.00000 | 10 | 0.00011 |
| <i>Bacteroides</i> _heparinolyticus            | 0.0  | 0.00000 | 0  | 0.00000 | 20 | 0.00023 |
| <i>Porphyromonas</i> _Genus_probe_3            | 0.0  | 0.00000 | 10 | 0.00022 | 0  | 0.00000 |
| <i>Actinomyces</i> _Genus_probe_2              | 0.0  | 0.00000 | 10 | 0.00022 | 0  | 0.00000 |
| <i>Neisseria</i> _pharyngis                    | 0.0  | 0.00000 | 0  | 0.00000 | 10 | 0.00017 |
| <i>Veillonellaceae</i> [G-1]_sp_oral_taxon_129 | 0.0  | 0.00000 | 0  | 0.00000 | 10 | 0.00017 |
| <i>Atopobium</i> _sp_oral_taxon_810            | 0.0  | 0.00000 | 0  | 0.00000 | 10 | 0.00014 |
| <i>Enterococcus</i> _faecalis                  | 0.0  | 0.00000 | 0  | 0.00000 | 10 | 0.00014 |
| <i>Lactobacillus</i> _sp_oral_taxon_052        | 0.0  | 0.00000 | 0  | 0.00000 | 10 | 0.00014 |
| <i>Brevundimonas</i> _diminuta                 | 0.0  | 0.00000 | 10 | 0.00014 | 0  | 0.00000 |
| <i>Actinomyces</i> _georgiae                   | 0.0  | 0.00000 | 0  | 0.00000 | 10 | 0.00014 |
| <i>Porphyromonas</i> _catoni                   | 0.0  | 0.00000 | 0  | 0.00000 | 10 | 0.00014 |

*ae*

*Porphyromonas\_catoni* 0.0 0.00000 0 0.00000 10 0.00014  
*ae*

*Stomatobaculum\_sp\_or* 0.0 0.00000 0 0.00000 0 0.00000  
*al\_taxon\_910*

*Actinomyces\_timonensi* 0.0 0.00000 10 0.00013 0 0.00000  
*s*

*Corynebacterium\_diphth* 0.0 0.00000 10 0.00013 0 0.00000  
*heriae*

*Clostridiales[F-2][G-* 0.0 0.00000 0 0.00000 10 0.00010  
*3]\_sp\_oral\_taxon\_366*

*Propionibacterium\_acid* 0.0 0.00000 0 0.00000 10 0.00010  
*ifaciens*

*Prevotella\_sp\_oral\_tax* 0.0 0.00000 10 0.00008 0 0.00000  
*on\_310*
